# Supplementary material
Source: PubMed Central journal article supplement (PMC8502787)
Supplement: mmc1.pdf [file mmc1.pdf]

## APPENDIX TEXT

### Policy categories in the Public Health Protective Policy Index (PPI)

The closures of air, sea, and land borders, the numerical size limits of social gatherings, the closures of schools, entertainment venues, restaurants, non-essential businesses, government offices, and public transportation, the declarations of state of emergencies, the working from home requirement for businesses/organizations, personal mobility restrictions, self-isolation and quarantine requirements, and the requirements to wear face coverings.

### The model used for capturing the relationship between PPI and the number of new cases

#### Model specification

This model is roughly based on the Susceptible-Infected-Removed model.

$$I_{j,(t+1)}^{new} = \sigma \kappa_{j,t} \frac{S_{j,t}}{N} I_{j,t}$$

Informally, the number of new infections depends on the number of current active infections and the number of susceptible individuals. Each currently infected person has, on average,  $\kappa_{j,t}$  encounters with other people. Among those encounters,  $S_{j,t}/N$  are with the susceptible individuals. In  $\sigma$  of encounters with susceptible individuals, the susceptible individuals become infected.

The new infections at time  $(t + 1)$  in state  $j$  can be captured by the number of new cases in that period multiplied by the state-specific underreporting factor  $\mu_j$ ,  $(\mu_j C_{j,(t+1)}^{new})$ .

We parameterize the combination of  $\delta$  and  $\kappa_{j,t}$  using PPI and the state-level covariates,

$$(\delta\kappa)_{tj} = \exp(X_{tj}\beta).$$

We parameterize  $\mu_j$  using the ratio of the count of COVID-19 tests that turned negative to the population and the number of residents per active physician in the state,  $\mu_j = \exp\{U_j\delta + \epsilon_j\}$ .

The fraction of the susceptible individuals in the society declines with the number of those infected, recovered, and diseased: We capture it using  $(1 - \frac{\mu_j C_{j,t}}{N})$ , where  $C_{j,t}$  is the observed cumulative number of cases and  $\mu$  is the underreporting factor.

Finally, we capture  $I_{j,t}$  as sum of the lagged values of new cases in the state weighted by  $\mu_j e^{-\gamma(t-T)}$ , where  $T$  is the timestamp of the lagged value and  $\gamma$  is the rate-of-decay parameter.

We add the unknown number of imported cases to the estimate of active infections.

We treat the number of new cases as a random variable that follows a negative binomial distribution and has the mean of

$$\ln(E[\mu_j C_{j,(t+1)}^{\text{new}}]) = \ln\left(1 - \frac{\mu_j C_{j,t}}{N}\right) + X_{j,t}\beta + \ln(\mu_j(\xi + G_{j,t}\omega))$$

and the dispersion parameter  $r$ . Here,  $\mu_j\xi$  represents imported cases and is also used to prevent the number of active cases reaching zero – in such a case,  $\ln(\xi + G_{j,t}\omega)$  would be undefined.

Subtracting  $\ln(\mu_j)$  from both sides we obtain

$$\ln(E[C_{j,(t+1)}^{\text{new}}]) = \ln\left(1 - \frac{\mu_j C_{j,t}}{N}\right) + X_{j,t}\beta + \ln(\xi + G_{j,t}\omega)$$

Here,  $\omega_l = e^{-\gamma l}$  and  $G_{j,t}$  is a matrix with lagged values of new cases, with  $l$  running from 0 to 21, and  $\mu_j = \exp\{U_j\delta + \epsilon_j\}$ .

The prior distributions are as follows:

$$\begin{aligned}
 (\beta, \delta) &\sim MVN(0, \Omega^{-1}) \\
 \Omega &\sim \text{invWishart}(0.1I, 15) \\
 \xi &\sim \text{Gamma}(0.01, 0.01) \\
 \omega &\sim \text{Gamma}(0.01, 0.01) \\
 \epsilon &\sim \text{Normal}(0, \tau^{-1}) \\
 \tau &\sim \text{Gamma}(0.01, 0.01) \\
 r &\sim \text{Gamma}(0.01, 0.01)
 \end{aligned}$$

The state-level control variables, included in  $X$ , are listed below:

| <b>Variable</b>                       | <b>Coefficient</b> | <b>Source</b>                                                                                                                                                                                                                                                                                                          |
|---------------------------------------|--------------------|------------------------------------------------------------------------------------------------------------------------------------------------------------------------------------------------------------------------------------------------------------------------------------------------------------------------|
| Rural population                      | beta[3]            | University of Wisconsin Population Health Institute. County Health Rankings and Roadmaps. 2020 County Health Rankings. <a href="https://www.countyhealthrankings.org/explore-health-rankings/rankings-data-documentation">https://www.countyhealthrankings.org/explore-health-rankings/rankings-data-documentation</a> |
| Share of population that is Hispanic  | beta[4]            | University of Wisconsin Population Health Institute. County Health Rankings and Roadmaps. 2020 County Health Rankings. <a href="https://www.countyhealthrankings.org/explore-health-rankings/rankings-data-documentation">https://www.countyhealthrankings.org/explore-health-rankings/rankings-data-documentation</a> |
| Share of population that is Black     | beta[5]            | University of Wisconsin Population Health Institute. County Health Rankings and Roadmaps. 2020 County Health Rankings. <a href="https://www.countyhealthrankings.org/explore-health-rankings/rankings-data-documentation">https://www.countyhealthrankings.org/explore-health-rankings/rankings-data-documentation</a> |
| Share of population over age 65 years | beta[6]            | University of Wisconsin Population Health Institute. County Health Rankings and Roadmaps. 2020 County Health Rankings. <a href="https://www.countyhealthrankings.org/explore-health-rankings/rankings-data-documentation">https://www.countyhealthrankings.org/explore-health-rankings/rankings-data-documentation</a> |

**Appendix**  
**Governor's Party, Policies, and COVID-19 Outcomes: Further Evidence of an Effect**  
**Shvetsova et al.**

|                                            |          |                                                                                                                                                                                                                                                                                                                        |
|--------------------------------------------|----------|------------------------------------------------------------------------------------------------------------------------------------------------------------------------------------------------------------------------------------------------------------------------------------------------------------------------|
| Prevalence of obesity                      | beta[7]  | University of Wisconsin Population Health Institute. County Health Rankings and Roadmaps. 2020 County Health Rankings. <a href="https://www.countyhealthrankings.org/explore-health-rankings/rankings-data-documentation">https://www.countyhealthrankings.org/explore-health-rankings/rankings-data-documentation</a> |
| Prevalence of smoking                      | beta[8]  | University of Wisconsin Population Health Institute. County Health Rankings and Roadmaps. 2020 County Health Rankings. <a href="https://www.countyhealthrankings.org/explore-health-rankings/rankings-data-documentation">https://www.countyhealthrankings.org/explore-health-rankings/rankings-data-documentation</a> |
| Prevalence of asthma                       | beta[9]  | Centers for Disease Control and Prevention. U.S. Chronic Disease Indicators (CDI). <a href="https://chronicdata.cdc.gov/Chronic-Disease-Indicators/U-S-Chronic-Disease-Indicators-CDI-/g4ie-h725">https://chronicdata.cdc.gov/Chronic-Disease-Indicators/U-S-Chronic-Disease-Indicators-CDI-/g4ie-h725</a>             |
| Share of heart disease deaths              | beta[10] | Centers for Disease Control and Prevention. U.S. Chronic Disease Indicators (CDI). <a href="https://chronicdata.cdc.gov/Chronic-Disease-Indicators/U-S-Chronic-Disease-Indicators-CDI-/g4ie-h725">https://chronicdata.cdc.gov/Chronic-Disease-Indicators/U-S-Chronic-Disease-Indicators-CDI-/g4ie-h725</a>             |
| Number of active physicians per 100,000    | beta[11] | Centers for Disease Control and Prevention. Table 83. Active physicians and physicians in patient care, by state: United States, selected years 1975–2015. <a href="https://www.cdc.gov/nchs/data/hus/2017/083.pdf">https://www.cdc.gov/nchs/data/hus/2017/083.pdf</a>                                                 |
| Population density                         | beta[12] | United States Census Bureau. Population. <a href="https://www2.census.gov/programs-surveys/popest/datasets/2010-2019/state/detail/">https://www2.census.gov/programs-surveys/popest/datasets/2010-2019/state/detail/</a>                                                                                               |
| Share of population below the poverty line | beta[13] | United States Census Bureau. SAIPE State and County Estimates for 2019. <a href="https://www.census.gov/data/datasets/2019/demo/saipe/2019-state-and-county.html">https://www.census.gov/data/datasets/2019/demo/saipe/2019-state-and-county.html</a>                                                                  |

The determinants of the underreporting are as follows:

| <b>Variable</b>                                | <b>Coefficient</b> | <b>Source</b>                                                                                                                                                                                                                                                                                                          |
|------------------------------------------------|--------------------|------------------------------------------------------------------------------------------------------------------------------------------------------------------------------------------------------------------------------------------------------------------------------------------------------------------------|
| Negative tests from May to November per capita | delta[2]           | COVID-19 diagnostic laboratory testing (PCR testing) time series. HealthData.gov. <a href="https://healthdata.gov/dataset/COVID-19-Diagnostic-Laboratory-Testing-PCR-Testing/j8mb-icvb">https://healthdata.gov/dataset/COVID-19-Diagnostic-Laboratory-Testing-PCR-Testing/j8mb-icvb</a>                                |
| Number of people per physician                 | delta[3]           | University of Wisconsin Population Health Institute. County Health Rankings and Roadmaps. 2020 County Health Rankings. <a href="https://www.countyhealthrankings.org/explore-health-rankings/rankings-data-documentation">https://www.countyhealthrankings.org/explore-health-rankings/rankings-data-documentation</a> |

Estimates

All covariates, except PPI, were centered and scaled before the inclusion in the analysis.

**Appendix**  
**Governor's Party, Policies, and COVID-19 Outcomes: Further Evidence of an Effect**  
**Shvetsova et al.**

Below are the estimates (posterior means with 95% central posterior intervals) for the full and reduced models. In addition to the intermediate models and the full model, it includes the estimates that employ 7 and 14 days lags for the PPI values.

**Appendix**  
**Governor's Party, Policies, and COVID-19 Outcomes: Further Evidence of an Effect**  
**Shvetsova et al.**

| <b>Parameter</b>                | <b>1</b>                     | <b>2</b>                      | <b>3</b>                      | <b>4</b>                      | <b>Full model main<br/>(PPI values have<br/>a 3-day lag)</b> | <b>Full<br/>model<br/>(7-day<br/>lag)</b> | <b>Full<br/>model<br/>(14-day<br/>lag)</b> |
|---------------------------------|------------------------------|-------------------------------|-------------------------------|-------------------------------|--------------------------------------------------------------|-------------------------------------------|--------------------------------------------|
| beta[1] (Constant)              | -0.91<br>(-0.971,<br>-0.850) | -0.968<br>(-1.028,<br>-0.911) | -0.938<br>(-1.001,<br>-0.880) | -0.888<br>(-0.944,<br>-0.828) | -0.825<br>(-0.890, -0.761)                                   | -0.832<br>(-0.888,<br>-0.773)             | -0.913<br>(-0.967,<br>-0.861)              |
| beta[2] (PPI)                   | -0.67<br>(-0.757,<br>-0.583) | -0.606<br>(-0.692,<br>-0.517) | -0.655<br>(-0.750,<br>-0.560) | -0.716<br>(-0.806,<br>-0.630) | -0.839<br>(-0.939, -0.736)                                   | -0.955<br>(-1.051,<br>-0.856)             | -0.987<br>(-1.074,<br>-0.901)              |
| beta[3] (Rural population)      |                              |                               | -0.034<br>(-0.059,<br>-0.008) | -0.038<br>(-0.065,<br>-0.011) | -0.043<br>(-0.073, -0.015)                                   | -0.046<br>(-0.074,<br>-0.019)             | -0.046<br>(-0.075,<br>-0.018)              |
| beta[4] (Share of Hispanic)     |                              |                               | -0.005<br>(-0.032,<br>0.022)  | -0.015<br>(-0.046,<br>0.014)  | -0.013<br>(-0.047, 0.019)                                    | -0.015<br>(-0.049,<br>0.015)              | -0.017<br>(-0.050,<br>0.015)               |
| beta[5] (Share of Blacks)       |                              |                               | 0.015<br>(-0.005,<br>0.035)   | 0.01<br>(-0.011,<br>0.032)    | 0.024<br>(-0.002, 0.050)                                     | 0.022<br>(-0.002,<br>0.049)               | 0.019<br>(-0.007,<br>0.045)                |
| beta[6] (Population over 65)    |                              |                               | 0.008<br>(-0.012,<br>0.028)   | 0.006<br>(-0.013,<br>0.026)   | 0.009<br>(-0.013, 0.034)                                     | 0.013<br>(-0.010,<br>0.037)               | 0.013<br>(-0.009,<br>0.036)                |
| beta[7] (Prevalence of obesity) |                              |                               | 0.021<br>(-0.008,<br>0.050)   | 0.025<br>(-0.004,<br>0.054)   | 0.026<br>(-0.007, 0.058)                                     | 0.028<br>(-0.005,<br>0.061)               | 0.026<br>(-0.006,<br>0.058)                |
| beta[8] (Prevalence of smoking) |                              |                               | -0.005<br>(-0.038,<br>0.023)  | -0.014<br>(-0.045,<br>0.018)  | -0.02<br>(-0.054, 0.014)                                     | -0.019<br>(-0.055,<br>0.016)              | -0.015<br>(-0.048,<br>0.020)               |
| beta[9] (Prevalence of asthma)  |                              |                               | 0.016<br>(-0.003,<br>0.034)   | 0.005<br>(-0.013,<br>0.024)   | 0.012<br>(-0.009, 0.035)                                     | 0.015<br>(-0.006,<br>0.037)               | 0.015<br>(-0.007,<br>0.036)                |
| beta[10] (Heart disease deaths) |                              |                               |                               | -0.019<br>-0.018              | -0.025                                                       | -0.033                                    | -0.036                                     |

**Appendix**  
**Governor's Party, Policies, and COVID-19 Outcomes: Further Evidence of an Effect**  
**Shvetsova et al.**

|                                                     |                         |                         |                           |                           |                           |                           |                           |
|-----------------------------------------------------|-------------------------|-------------------------|---------------------------|---------------------------|---------------------------|---------------------------|---------------------------|
|                                                     |                         |                         | (-0.049, 0.011)           | (-0.045, 0.011)           | (-0.062, 0.011)           | (-0.069, 0.000)           | (-0.069, -0.002)          |
| beta[11] (Number of active physicians per 100,000)  |                         |                         | 0.032<br>(0.011, 0.054)   | 0.03<br>(0.007, 0.053)    | 0.052<br>(0.021, 0.082)   | 0.054<br>(0.024, 0.084)   | 0.049<br>(0.020, 0.078)   |
| beta[12] (Population density)                       |                         |                         | -0.013<br>(-0.037, 0.009) | -0.006<br>(-0.030, 0.015) | -0.016<br>(-0.045, 0.015) | -0.016<br>(-0.045, 0.013) | -0.016<br>(-0.044, 0.014) |
| beta[13] (Below the poverty line)                   |                         |                         | 0.017<br>(-0.012, 0.047)  | 0.028<br>(-0.003, 0.060)  | 0.036<br>(-0.001, 0.074)  | 0.042<br>(0.007, 0.081)   | 0.042<br>(0.007, 0.079)   |
| gamma (removal rate)                                | 0.259<br>(0.246, 0.272) | 0.269<br>(0.254, 0.282) | 0.27<br>(0.256, 0.284)    | 0.258<br>(0.243, 0.272)   | 0.254<br>(0.240, 0.269)   | 0.237<br>(0.223, 0.251)   | 0.215<br>(0.202, 0.229)   |
| mu (underreporting)                                 | 4.585<br>(3.821, 5.291) | Fixed at 1              | Fixed at 1                | 4.725<br>(4.009, 5.423)   | Varies by state           | Varies by state           | Varies by state           |
| delta[1] (underrep: Constant)                       |                         |                         |                           |                           | 0.36<br>(0.035, 0.565)    | 0.28<br>(-0.089, 0.529)   | 0.122<br>(-0.335, 0.440)  |
| delta[2] (underrep: Negative tests per capita)      |                         |                         |                           |                           | -0.16<br>(-0.498, 0.070)  | -0.188<br>(-0.552, 0.119) | -0.188<br>(-0.633, 0.191) |
| delta[3] (underreporting: Population per physician) |                         |                         |                           |                           | -0.102<br>(-0.335, 0.142) | -0.092<br>(-0.413, 0.198) | -0.045<br>(-0.492, 0.341) |
| r                                                   | 1.783<br>(1.737, 1.828) | 1.775<br>(1.730, 1.821) | 1.777<br>(1.733, 1.822)   | 1.786<br>(1.743, 1.830)   | 1.796<br>(1.750, 1.841)   | 1.812<br>(1.766, 1.857)   | 1.828<br>(1.782, 1.875)   |
| xi                                                  | 1.282<br>(1.024, 1.569) | 1.52<br>(1.227, 1.851)  | 1.472<br>(1.193, 1.795)   | 1.264<br>(1.007, 1.545)   | 1.118<br>(0.886, 1.376)   | 1.054<br>(0.834, 1.303)   | 1.172<br>(0.937, 1.432)   |

**Appendix**  
**Governor's Party, Policies, and COVID-19 Outcomes: Further Evidence of an Effect**  
**Shvetsova et al.**

---

|     |           |           |           |           |           |           |           |
|-----|-----------|-----------|-----------|-----------|-----------|-----------|-----------|
| DIC | 181,626.6 | 181,700.1 | 181,687.0 | 181,609.7 | 181,598.0 | 181,465.4 | 181,354.5 |
|-----|-----------|-----------|-----------|-----------|-----------|-----------|-----------|

---

**Appendix**  
**Governor's Party, Policies, and COVID-19 Outcomes: Further Evidence of an Effect**  
**Shvetsova et al.**

Estimates of the state-specific underreporting parameters ( $\mu_j$ ):

| State | mu (mean) | mu (95% central posterior interval) | Negative tests per capita | Population/doctors |
|-------|-----------|-------------------------------------|---------------------------|--------------------|
| AK    | 2.566     | (0.440, 6.107)                      | 1.44                      | 1,112.28           |
| AL    | 4.344     | (1.522, 7.262)                      | 0.46                      | 1,529.34           |
| AR    | 5.199     | (2.019, 8.224)                      | 0.48                      | 1,503.90           |
| AZ    | 8.133     | (5.464, 9.548)                      | 0.40                      | 1,535.46           |
| CA    | 7.711     | (2.710, 12.682)                     | 0.50                      | 1,274.31           |
| CO    | 4.57      | (1.083, 9.095)                      | 0.48                      | 1,233.97           |
| CT    | 4.713     | (0.929, 9.701)                      | 1.04                      | 1,180.35           |
| DE    | 1.991     | (0.404, 4.413)                      | 0.83                      | 1,400.10           |
| FL    | 5.387     | (2.180, 8.445)                      | 0.56                      | 1,386.64           |
| GA    | 5.697     | (2.468, 8.878)                      | 0.35                      | 1,521.15           |
| HI    | 6.357     | (1.063, 15.506)                     | 0.43                      | 1,132.88           |
| IA    | 4.711     | (2.008, 7.185)                      | 0.59                      | 1,390.72           |
| ID    | 6.191     | (2.933, 9.168)                      | 0.36                      | 1,547.00           |
| IL    | 3.486     | (0.975, 6.413)                      | 0.67                      | 1,233.53           |
| IN    | 3.459     | (0.841, 6.867)                      | 0.59                      | 1,495.28           |
| KS    | 2.04      | (0.468, 4.216)                      | 0.44                      | 1,313.14           |
| KY    | 2.5       | (0.538, 5.368)                      | 0.40                      | 1,520.55           |
| LA    | 5.034     | (2.057, 7.965)                      | 0.70                      | 1,502.94           |
| MA    | 11.655    | (5.964, 16.329)                     | 1.16                      | 962.52             |
| MD    | 11.131    | (5.763, 15.695)                     | 0.71                      | 1,139.69           |
| ME    | 8.642     | (1.165, 21.078)                     | 0.62                      | 890.62             |
| MI    | 2.874     | (0.600, 6.221)                      | 0.63                      | 1,261.06           |
| MN    | 1.837     | (0.381, 4.024)                      | 0.85                      | 1,121.71           |
| MO    | 6.855     | (3.135, 10.206)                     | 0.46                      | 1,416.65           |
| MS    | 6.411     | (2.890, 9.597)                      | 0.23                      | 1,895.20           |
| MT    | 3.676     | (0.970, 7.028)                      | 0.47                      | 1,348.67           |
| NC    | 9.551     | (4.640, 14.009)                     | 0.43                      | 1,420.92           |
| ND    | 4.359     | (2.342, 5.922)                      | 1.29                      | 1,315.89           |
| NE    | 5.635     | (2.743, 8.189)                      | 0.50                      | 1,323.47           |
| NH    | 7.703     | (1.265, 18.804)                     | 0.58                      | 1,101.32           |
| NJ    | 3.461     | (0.775, 7.036)                      | 0.63                      | 1,191.80           |
| NM    | 2.843     | (0.588, 6.074)                      | 0.51                      | 1,343.46           |
| NV    | 4.338     | (1.258, 7.929)                      | 0.50                      | 1,761.57           |
| NY    | 6.433     | (2.360, 10.692)                     | 0.88                      | 1,199.59           |
| OH    | 9.229     | (5.237, 11.018)                     | 0.48                      | 1,304.40           |
| OK    | 4.902     | (1.740, 8.191)                      | 0.26                      | 1,589.13           |
| OR    | 7.733     | (1.333, 17.511)                     | 0.35                      | 1,081.78           |
| PA    | 12.005    | (4.890, 18.452)                     | 0.44                      | 1,234.36           |
| RI    | 4.757     | (1.271, 8.243)                      | 1.20                      | 1,036.73           |
| SC    | 3.789     | (1.093, 6.951)                      | 0.41                      | 1,489.38           |

**Appendix**  
**Governor's Party, Policies, and COVID-19 Outcomes: Further Evidence of an Effect**  
**Shvetsova et al.**

|    |       |                 |      |          |
|----|-------|-----------------|------|----------|
| SD | 2.629 | (0.834, 4.560)  | 0.41 | 1,319.29 |
| TN | 2.832 | (0.750, 5.411)  | 0.52 | 1,385.09 |
| TX | 6.45  | (2.497, 10.189) | 0.36 | 1,657.01 |
| UT | 2.45  | (0.573, 5.129)  | 0.56 | 1,769.85 |
| VA | 8.731 | (3.339, 14.238) | 0.38 | 1,309.64 |
| VT | 4.976 | (0.712, 12.655) | 0.89 | 883.44   |
| WA | 9.007 | (2.274, 16.210) | 0.29 | 1,217.51 |
| WI | 2.314 | (0.528, 4.524)  | 0.78 | 1,252.43 |
| WV | 3.114 | (0.613, 7.358)  | 0.64 | 1,268.95 |
| WY | 4.297 | (1.131, 8.139)  | 0.67 | 1,474.81 |

**The model used for capturing the average PPI among the states with Republican and Democratic governors**

Model specification:

$$y_{tj} = A_t \beta_{p(j)} + A_t b_j + \epsilon_{tj}$$

$$\beta_k \sim MVN(0, \Omega_\beta^{-1})$$

$$\Omega_\beta \sim \text{invWishart}(0.1I, 15)$$

$$b_j \sim MVN(0, \Omega_b^{-1})$$

$$\Omega_b \sim \text{invWishart}(0.1I, 15)$$

$$\epsilon_{tj} \sim N(0, \tau^{-1})$$

$$\tau \sim \text{Gamma}(0.001, 0.001)$$

$A_t$  is a natural spline basis with an embedded intercept. The knots are spaced 14 days apart.

$\beta_{p(j)}$  is a vector of coefficients specific to the party of the state's governor.

$b_j$  is a vector of coefficients specific to a state.

Estimates:

| Parameter  | Posterior mean | 95% central posterior interval |      | Gelman–Rubin statistic |
|------------|----------------|--------------------------------|------|------------------------|
| beta.D[1]  | 0.12           | 0.11                           | 0.13 | 1.00                   |
| beta.D[2]  | 0.73           | 0.73                           | 0.74 | 1.00                   |
| beta.D[3]  | 0.63           | 0.62                           | 0.64 | 1.00                   |
| beta.D[4]  | 0.69           | 0.69                           | 0.70 | 1.00                   |
| beta.D[5]  | 0.68           | 0.67                           | 0.69 | 1.00                   |
| beta.D[6]  | 0.66           | 0.66                           | 0.67 | 1.00                   |
| beta.D[7]  | 0.59           | 0.59                           | 0.60 | 1.00                   |
| beta.D[8]  | 0.57           | 0.56                           | 0.57 | 1.00                   |
| beta.D[9]  | 0.59           | 0.58                           | 0.60 | 1.00                   |
| beta.D[10] | 0.60           | 0.59                           | 0.60 | 1.00                   |
| beta.D[11] | 0.58           | 0.58                           | 0.59 | 1.00                   |
| beta.D[12] | 0.59           | 0.58                           | 0.60 | 1.00                   |
| beta.D[13] | 0.60           | 0.59                           | 0.61 | 1.00                   |
| beta.D[14] | 0.58           | 0.58                           | 0.59 | 1.00                   |

**Appendix**  
**Governor's Party, Policies, and COVID-19 Outcomes: Further Evidence of an Effect**  
**Shvetsova et al.**

|            |       |       |       |      |
|------------|-------|-------|-------|------|
| beta.D[15] | 0.59  | 0.58  | 0.59  | 1.00 |
| beta.D[16] | 0.56  | 0.56  | 0.57  | 1.00 |
| beta.D[17] | 0.57  | 0.56  | 0.57  | 1.00 |
| beta.D[18] | 0.56  | 0.55  | 0.57  | 1.00 |
| beta.D[19] | 0.57  | 0.56  | 0.57  | 1.00 |
| beta.D[20] | 0.65  | 0.64  | 0.65  | 1.00 |
| beta.D[21] | 0.54  | 0.53  | 0.54  | 1.00 |
| beta.R[1]  | 0.11  | 0.10  | 0.11  | 1.00 |
| beta.R[2]  | 0.59  | 0.58  | 0.59  | 1.00 |
| beta.R[3]  | 0.60  | 0.59  | 0.61  | 1.00 |
| beta.R[4]  | 0.62  | 0.62  | 0.63  | 1.00 |
| beta.R[5]  | 0.60  | 0.59  | 0.60  | 1.00 |
| beta.R[6]  | 0.57  | 0.56  | 0.57  | 1.00 |
| beta.R[7]  | 0.53  | 0.52  | 0.54  | 1.00 |
| beta.R[8]  | 0.50  | 0.49  | 0.50  | 1.00 |
| beta.R[9]  | 0.49  | 0.48  | 0.49  | 1.00 |
| beta.R[10] | 0.49  | 0.49  | 0.50  | 1.00 |
| beta.R[11] | 0.47  | 0.47  | 0.48  | 1.00 |
| beta.R[12] | 0.46  | 0.45  | 0.47  | 1.00 |
| beta.R[13] | 0.47  | 0.46  | 0.47  | 1.00 |
| beta.R[14] | 0.46  | 0.45  | 0.47  | 1.00 |
| beta.R[15] | 0.46  | 0.45  | 0.46  | 1.00 |
| beta.R[16] | 0.45  | 0.45  | 0.46  | 1.00 |
| beta.R[17] | 0.45  | 0.45  | 0.46  | 1.00 |
| beta.R[18] | 0.46  | 0.45  | 0.46  | 1.00 |
| beta.R[19] | 0.46  | 0.45  | 0.46  | 1.00 |
| beta.R[20] | 0.53  | 0.52  | 0.53  | 1.00 |
| beta.R[21] | 0.43  | 0.43  | 0.44  | 1.00 |
| b[1,AK]    | 0.05  | 0.02  | 0.07  | 1.00 |
| b[2,AK]    | -0.10 | -0.12 | -0.07 | 1.00 |
| b[3,AK]    | -0.18 | -0.21 | -0.16 | 1.00 |
| b[4,AK]    | -0.19 | -0.21 | -0.16 | 1.00 |
| b[5,AK]    | -0.13 | -0.16 | -0.11 | 1.00 |
| b[6,AK]    | -0.17 | -0.20 | -0.15 | 1.00 |
| b[7,AK]    | -0.05 | -0.08 | -0.03 | 1.00 |
| b[8,AK]    | -0.23 | -0.25 | -0.20 | 1.00 |
| b[9,AK]    | -0.01 | -0.04 | 0.02  | 1.00 |
| b[10,AK]   | -0.07 | -0.10 | -0.04 | 1.00 |
| b[11,AK]   | -0.09 | -0.12 | -0.07 | 1.00 |
| b[12,AK]   | -0.09 | -0.12 | -0.06 | 1.00 |
| b[13,AK]   | -0.08 | -0.11 | -0.06 | 1.00 |
| b[14,AK]   | -0.13 | -0.16 | -0.11 | 1.00 |
| b[15,AK]   | -0.14 | -0.16 | -0.11 | 1.00 |
| b[16,AK]   | -0.12 | -0.14 | -0.09 | 1.00 |

**Appendix**  
**Governor's Party, Policies, and COVID-19 Outcomes: Further Evidence of an Effect**  
**Shvetsova et al.**

|          |       |       |       |      |
|----------|-------|-------|-------|------|
| b[17,AK] | -0.11 | -0.14 | -0.08 | 1.00 |
| b[18,AK] | -0.13 | -0.16 | -0.10 | 1.00 |
| b[19,AK] | -0.09 | -0.12 | -0.07 | 1.00 |
| b[20,AK] | -0.06 | -0.08 | -0.03 | 1.00 |
| b[21,AK] | -0.10 | -0.12 | -0.07 | 1.00 |
| b[1,AL]  | -0.17 | -0.20 | -0.14 | 1.00 |
| b[2,AL]  | 0.15  | 0.12  | 0.18  | 1.00 |
| b[3,AL]  | 0.14  | 0.11  | 0.17  | 1.00 |
| b[4,AL]  | 0.16  | 0.13  | 0.19  | 1.00 |
| b[5,AL]  | 0.21  | 0.18  | 0.23  | 1.00 |
| b[6,AL]  | 0.12  | 0.09  | 0.14  | 1.00 |
| b[7,AL]  | 0.02  | -0.01 | 0.04  | 1.00 |
| b[8,AL]  | -0.10 | -0.12 | -0.07 | 1.00 |
| b[9,AL]  | -0.13 | -0.15 | -0.10 | 1.00 |
| b[10,AL] | -0.02 | -0.04 | 0.01  | 1.00 |
| b[11,AL] | -0.08 | -0.11 | -0.06 | 1.00 |
| b[12,AL] | -0.05 | -0.08 | -0.03 | 1.00 |
| b[13,AL] | -0.08 | -0.10 | -0.05 | 1.00 |
| b[14,AL] | -0.06 | -0.09 | -0.04 | 1.00 |
| b[15,AL] | -0.05 | -0.08 | -0.03 | 1.00 |
| b[16,AL] | -0.01 | -0.03 | 0.02  | 1.00 |
| b[17,AL] | -0.02 | -0.05 | 0.01  | 1.00 |
| b[18,AL] | -0.01 | -0.04 | 0.02  | 1.00 |
| b[19,AL] | -0.03 | -0.06 | -0.01 | 1.00 |
| b[20,AL] | -0.03 | -0.06 | -0.01 | 1.00 |
| b[21,AL] | -0.03 | -0.06 | 0.00  | 1.00 |
| b[1,AR]  | -0.02 | -0.05 | 0.01  | 1.00 |
| b[2,AR]  | -0.01 | -0.03 | 0.02  | 1.00 |
| b[3,AR]  | -0.05 | -0.08 | -0.02 | 1.00 |
| b[4,AR]  | -0.05 | -0.08 | -0.02 | 1.00 |
| b[5,AR]  | -0.04 | -0.07 | -0.02 | 1.00 |
| b[6,AR]  | 0.07  | 0.04  | 0.10  | 1.00 |
| b[7,AR]  | -0.16 | -0.19 | -0.13 | 1.00 |
| b[8,AR]  | -0.19 | -0.21 | -0.16 | 1.00 |
| b[9,AR]  | -0.18 | -0.21 | -0.16 | 1.00 |
| b[10,AR] | -0.19 | -0.22 | -0.17 | 1.00 |
| b[11,AR] | -0.16 | -0.19 | -0.13 | 1.00 |
| b[12,AR] | -0.12 | -0.15 | -0.10 | 1.00 |
| b[13,AR] | -0.11 | -0.13 | -0.08 | 1.00 |
| b[14,AR] | -0.15 | -0.18 | -0.13 | 1.00 |
| b[15,AR] | -0.17 | -0.20 | -0.14 | 1.00 |
| b[16,AR] | -0.12 | -0.14 | -0.09 | 1.00 |
| b[17,AR] | -0.11 | -0.14 | -0.09 | 1.00 |
| b[18,AR] | -0.11 | -0.14 | -0.09 | 1.00 |

**Appendix**  
**Governor's Party, Policies, and COVID-19 Outcomes: Further Evidence of an Effect**  
**Shvetsova et al.**

|          |       |       |       |      |
|----------|-------|-------|-------|------|
| b[19,AR] | -0.13 | -0.15 | -0.10 | 1.00 |
| b[20,AR] | -0.15 | -0.18 | -0.13 | 1.00 |
| b[21,AR] | -0.12 | -0.15 | -0.09 | 1.00 |
| b[1,AZ]  | -0.10 | -0.13 | -0.07 | 1.00 |
| b[2,AZ]  | 0.18  | 0.15  | 0.21  | 1.00 |
| b[3,AZ]  | 0.12  | 0.09  | 0.15  | 1.00 |
| b[4,AZ]  | 0.13  | 0.11  | 0.16  | 1.00 |
| b[5,AZ]  | 0.20  | 0.17  | 0.23  | 1.00 |
| b[6,AZ]  | 0.13  | 0.10  | 0.16  | 1.00 |
| b[7,AZ]  | 0.17  | 0.14  | 0.20  | 1.00 |
| b[8,AZ]  | 0.21  | 0.19  | 0.24  | 1.00 |
| b[9,AZ]  | 0.18  | 0.15  | 0.21  | 1.00 |
| b[10,AZ] | 0.19  | 0.16  | 0.21  | 1.00 |
| b[11,AZ] | 0.18  | 0.16  | 0.21  | 1.00 |
| b[12,AZ] | 0.20  | 0.17  | 0.23  | 1.00 |
| b[13,AZ] | 0.16  | 0.13  | 0.19  | 1.00 |
| b[14,AZ] | 0.05  | 0.03  | 0.08  | 1.00 |
| b[15,AZ] | 0.11  | 0.08  | 0.14  | 1.00 |
| b[16,AZ] | 0.10  | 0.08  | 0.13  | 1.00 |
| b[17,AZ] | 0.11  | 0.09  | 0.14  | 1.00 |
| b[18,AZ] | 0.11  | 0.08  | 0.14  | 1.00 |
| b[19,AZ] | 0.10  | 0.07  | 0.13  | 1.00 |
| b[20,AZ] | 0.06  | 0.03  | 0.08  | 1.00 |
| b[21,AZ] | 0.08  | 0.05  | 0.10  | 1.00 |
| b[1,CA]  | 0.04  | 0.01  | 0.07  | 1.00 |
| b[2,CA]  | 0.28  | 0.25  | 0.31  | 1.00 |
| b[3,CA]  | -0.02 | -0.05 | 0.00  | 1.00 |
| b[4,CA]  | 0.21  | 0.18  | 0.23  | 1.00 |
| b[5,CA]  | 0.05  | 0.02  | 0.07  | 1.00 |
| b[6,CA]  | 0.04  | 0.01  | 0.06  | 1.00 |
| b[7,CA]  | 0.11  | 0.08  | 0.13  | 1.00 |
| b[8,CA]  | 0.14  | 0.11  | 0.17  | 1.00 |
| b[9,CA]  | 0.10  | 0.07  | 0.13  | 1.00 |
| b[10,CA] | 0.12  | 0.09  | 0.15  | 1.00 |
| b[11,CA] | 0.09  | 0.07  | 0.12  | 1.00 |
| b[12,CA] | 0.07  | 0.04  | 0.10  | 1.00 |
| b[13,CA] | 0.19  | 0.17  | 0.22  | 1.00 |
| b[14,CA] | 0.14  | 0.12  | 0.17  | 1.00 |
| b[15,CA] | 0.18  | 0.15  | 0.20  | 1.00 |
| b[16,CA] | 0.18  | 0.16  | 0.21  | 1.00 |
| b[17,CA] | 0.18  | 0.16  | 0.21  | 1.00 |
| b[18,CA] | 0.19  | 0.16  | 0.22  | 1.00 |
| b[19,CA] | 0.16  | 0.14  | 0.19  | 1.00 |
| b[20,CA] | 0.18  | 0.15  | 0.21  | 1.00 |

**Appendix**  
**Governor's Party, Policies, and COVID-19 Outcomes: Further Evidence of an Effect**  
**Shvetsova et al.**

|          |       |       |       |      |
|----------|-------|-------|-------|------|
| b[21,CA] | 0.16  | 0.13  | 0.19  | 1.00 |
| b[1,CO]  | 0.05  | 0.02  | 0.08  | 1.00 |
| b[2,CO]  | 0.20  | 0.17  | 0.23  | 1.00 |
| b[3,CO]  | -0.06 | -0.08 | -0.03 | 1.00 |
| b[4,CO]  | 0.10  | 0.07  | 0.13  | 1.00 |
| b[5,CO]  | 0.05  | 0.02  | 0.07  | 1.00 |
| b[6,CO]  | 0.10  | 0.07  | 0.13  | 1.00 |
| b[7,CO]  | 0.15  | 0.12  | 0.17  | 1.00 |
| b[8,CO]  | 0.21  | 0.18  | 0.24  | 1.00 |
| b[9,CO]  | -0.01 | -0.04 | 0.01  | 1.00 |
| b[10,CO] | 0.05  | 0.02  | 0.08  | 1.00 |
| b[11,CO] | 0.03  | 0.01  | 0.06  | 1.00 |
| b[12,CO] | 0.04  | 0.01  | 0.06  | 1.00 |
| b[13,CO] | 0.03  | 0.00  | 0.05  | 1.00 |
| b[14,CO] | 0.04  | 0.01  | 0.07  | 1.00 |
| b[15,CO] | 0.04  | 0.02  | 0.07  | 1.00 |
| b[16,CO] | 0.06  | 0.03  | 0.08  | 1.00 |
| b[17,CO] | 0.07  | 0.05  | 0.10  | 1.00 |
| b[18,CO] | 0.03  | 0.00  | 0.06  | 1.00 |
| b[19,CO] | 0.12  | 0.10  | 0.15  | 1.00 |
| b[20,CO] | 0.12  | 0.10  | 0.15  | 1.00 |
| b[21,CO] | 0.17  | 0.14  | 0.20  | 1.00 |
| b[1,CT]  | 0.01  | -0.02 | 0.04  | 1.00 |
| b[2,CT]  | -0.14 | -0.17 | -0.11 | 1.00 |
| b[3,CT]  | -0.06 | -0.09 | -0.03 | 1.00 |
| b[4,CT]  | -0.12 | -0.14 | -0.09 | 1.00 |
| b[5,CT]  | -0.12 | -0.14 | -0.09 | 1.00 |
| b[6,CT]  | -0.15 | -0.18 | -0.12 | 1.00 |
| b[7,CT]  | -0.09 | -0.12 | -0.07 | 1.00 |
| b[8,CT]  | -0.08 | -0.11 | -0.06 | 1.00 |
| b[9,CT]  | -0.05 | -0.08 | -0.03 | 1.00 |
| b[10,CT] | -0.04 | -0.07 | -0.01 | 1.00 |
| b[11,CT] | -0.04 | -0.06 | -0.01 | 1.00 |
| b[12,CT] | -0.04 | -0.06 | -0.01 | 1.00 |
| b[13,CT] | -0.05 | -0.08 | -0.02 | 1.00 |
| b[14,CT] | -0.03 | -0.06 | -0.01 | 1.00 |
| b[15,CT] | -0.03 | -0.06 | -0.01 | 1.00 |
| b[16,CT] | -0.01 | -0.04 | 0.01  | 1.00 |
| b[17,CT] | -0.02 | -0.04 | 0.01  | 1.00 |
| b[18,CT] | -0.01 | -0.04 | 0.02  | 1.00 |
| b[19,CT] | -0.03 | -0.05 | 0.00  | 1.00 |
| b[20,CT] | -0.05 | -0.08 | -0.02 | 1.00 |
| b[21,CT] | -0.02 | -0.05 | 0.01  | 1.00 |
| b[1,DE]  | -0.04 | -0.07 | -0.01 | 1.00 |

**Appendix**  
**Governor's Party, Policies, and COVID-19 Outcomes: Further Evidence of an Effect**  
**Shvetsova et al.**

|          |       |       |       |      |
|----------|-------|-------|-------|------|
| b[2,DE]  | -0.03 | -0.06 | 0.00  | 1.00 |
| b[3,DE]  | 0.11  | 0.08  | 0.13  | 1.00 |
| b[4,DE]  | 0.06  | 0.04  | 0.09  | 1.00 |
| b[5,DE]  | 0.13  | 0.11  | 0.16  | 1.00 |
| b[6,DE]  | 0.05  | 0.02  | 0.07  | 1.00 |
| b[7,DE]  | 0.02  | -0.01 | 0.05  | 1.00 |
| b[8,DE]  | 0.12  | 0.09  | 0.15  | 1.00 |
| b[9,DE]  | -0.02 | -0.04 | 0.01  | 1.00 |
| b[10,DE] | 0.07  | 0.05  | 0.10  | 1.00 |
| b[11,DE] | 0.12  | 0.09  | 0.14  | 1.00 |
| b[12,DE] | 0.11  | 0.09  | 0.14  | 1.00 |
| b[13,DE] | 0.10  | 0.07  | 0.13  | 1.00 |
| b[14,DE] | 0.12  | 0.09  | 0.14  | 1.00 |
| b[15,DE] | 0.11  | 0.09  | 0.14  | 1.00 |
| b[16,DE] | 0.14  | 0.11  | 0.16  | 1.00 |
| b[17,DE] | 0.13  | 0.11  | 0.16  | 1.00 |
| b[18,DE] | 0.14  | 0.11  | 0.17  | 1.00 |
| b[19,DE] | 0.11  | 0.08  | 0.14  | 1.00 |
| b[20,DE] | 0.13  | 0.11  | 0.16  | 1.00 |
| b[21,DE] | 0.11  | 0.08  | 0.13  | 1.00 |
| b[1,FL]  | 0.05  | 0.01  | 0.08  | 1.00 |
| b[2,FL]  | -0.06 | -0.09 | -0.03 | 1.00 |
| b[3,FL]  | 0.07  | 0.04  | 0.10  | 1.00 |
| b[4,FL]  | 0.00  | -0.03 | 0.02  | 1.00 |
| b[5,FL]  | 0.15  | 0.12  | 0.17  | 1.00 |
| b[6,FL]  | -0.28 | -0.30 | -0.25 | 1.00 |
| b[7,FL]  | -0.04 | -0.07 | -0.01 | 1.00 |
| b[8,FL]  | -0.09 | -0.12 | -0.07 | 1.00 |
| b[9,FL]  | -0.08 | -0.11 | -0.05 | 1.00 |
| b[10,FL] | -0.06 | -0.08 | -0.03 | 1.00 |
| b[11,FL] | -0.12 | -0.14 | -0.09 | 1.00 |
| b[12,FL] | 0.08  | 0.05  | 0.11  | 1.00 |
| b[13,FL] | 0.03  | 0.00  | 0.05  | 1.00 |
| b[14,FL] | 0.00  | -0.03 | 0.03  | 1.00 |
| b[15,FL] | -0.05 | -0.08 | -0.03 | 1.00 |
| b[16,FL] | 0.00  | -0.03 | 0.02  | 1.00 |
| b[17,FL] | -0.02 | -0.05 | 0.00  | 1.00 |
| b[18,FL] | -0.01 | -0.03 | 0.02  | 1.00 |
| b[19,FL] | -0.03 | -0.06 | 0.00  | 1.00 |
| b[20,FL] | -0.05 | -0.07 | -0.02 | 1.00 |
| b[21,FL] | -0.02 | -0.05 | 0.01  | 1.00 |
| b[1,GA]  | -0.06 | -0.09 | -0.03 | 1.00 |
| b[2,GA]  | -0.28 | -0.31 | -0.25 | 1.00 |
| b[3,GA]  | 0.13  | 0.11  | 0.16  | 1.00 |

**Appendix**  
**Governor's Party, Policies, and COVID-19 Outcomes: Further Evidence of an Effect**  
**Shvetsova et al.**

|          |       |       |       |      |
|----------|-------|-------|-------|------|
| b[4,GA]  | -0.06 | -0.08 | -0.03 | 1.00 |
| b[5,GA]  | 0.02  | 0.00  | 0.05  | 1.00 |
| b[6,GA]  | 0.08  | 0.06  | 0.11  | 1.00 |
| b[7,GA]  | -0.07 | -0.09 | -0.04 | 1.00 |
| b[8,GA]  | -0.01 | -0.04 | 0.01  | 1.00 |
| b[9,GA]  | -0.04 | -0.06 | -0.01 | 1.00 |
| b[10,GA] | 0.02  | -0.01 | 0.05  | 1.00 |
| b[11,GA] | -0.09 | -0.11 | -0.06 | 1.00 |
| b[12,GA] | -0.12 | -0.15 | -0.10 | 1.00 |
| b[13,GA] | -0.13 | -0.16 | -0.10 | 1.00 |
| b[14,GA] | -0.09 | -0.11 | -0.06 | 1.00 |
| b[15,GA] | -0.17 | -0.19 | -0.14 | 1.00 |
| b[16,GA] | -0.18 | -0.21 | -0.15 | 1.00 |
| b[17,GA] | -0.15 | -0.17 | -0.12 | 1.00 |
| b[18,GA] | -0.19 | -0.22 | -0.17 | 1.00 |
| b[19,GA] | -0.11 | -0.14 | -0.08 | 1.00 |
| b[20,GA] | -0.12 | -0.14 | -0.09 | 1.00 |
| b[21,GA] | -0.09 | -0.12 | -0.07 | 1.00 |
| b[1,HI]  | -0.02 | -0.05 | 0.01  | 1.00 |
| b[2,HI]  | 0.23  | 0.20  | 0.26  | 1.00 |
| b[3,HI]  | 0.09  | 0.07  | 0.12  | 1.00 |
| b[4,HI]  | 0.17  | 0.14  | 0.20  | 1.00 |
| b[5,HI]  | 0.15  | 0.12  | 0.17  | 1.00 |
| b[6,HI]  | 0.24  | 0.21  | 0.27  | 1.00 |
| b[7,HI]  | 0.08  | 0.06  | 0.11  | 1.00 |
| b[8,HI]  | 0.12  | 0.10  | 0.15  | 1.00 |
| b[9,HI]  | 0.16  | 0.13  | 0.18  | 1.00 |
| b[10,HI] | 0.16  | 0.13  | 0.18  | 1.00 |
| b[11,HI] | 0.17  | 0.15  | 0.20  | 1.00 |
| b[12,HI] | 0.15  | 0.12  | 0.17  | 1.00 |
| b[13,HI] | 0.18  | 0.16  | 0.21  | 1.00 |
| b[14,HI] | 0.17  | 0.14  | 0.20  | 1.00 |
| b[15,HI] | 0.23  | 0.21  | 0.26  | 1.00 |
| b[16,HI] | 0.11  | 0.08  | 0.13  | 1.00 |
| b[17,HI] | 0.08  | 0.05  | 0.10  | 1.00 |
| b[18,HI] | 0.05  | 0.02  | 0.07  | 1.00 |
| b[19,HI] | 0.08  | 0.06  | 0.11  | 1.00 |
| b[20,HI] | 0.08  | 0.06  | 0.11  | 1.00 |
| b[21,HI] | 0.11  | 0.08  | 0.14  | 1.00 |
| b[1,IA]  | -0.10 | -0.12 | -0.06 | 1.00 |
| b[2,IA]  | 0.00  | -0.03 | 0.03  | 1.00 |
| b[3,IA]  | 0.09  | 0.06  | 0.12  | 1.00 |
| b[4,IA]  | 0.07  | 0.05  | 0.10  | 1.00 |
| b[5,IA]  | 0.06  | 0.03  | 0.09  | 1.00 |

**Appendix**  
**Governor's Party, Policies, and COVID-19 Outcomes: Further Evidence of an Effect**  
**Shvetsova et al.**

|          |       |       |       |      |
|----------|-------|-------|-------|------|
| b[6,IA]  | 0.09  | 0.06  | 0.12  | 1.00 |
| b[7,IA]  | 0.16  | 0.13  | 0.18  | 1.00 |
| b[8,IA]  | 0.18  | 0.16  | 0.21  | 1.00 |
| b[9,IA]  | 0.16  | 0.13  | 0.19  | 1.00 |
| b[10,IA] | 0.15  | 0.13  | 0.18  | 1.00 |
| b[11,IA] | 0.17  | 0.14  | 0.19  | 1.00 |
| b[12,IA] | 0.16  | 0.13  | 0.18  | 1.00 |
| b[13,IA] | 0.15  | 0.13  | 0.18  | 1.00 |
| b[14,IA] | 0.16  | 0.14  | 0.19  | 1.00 |
| b[15,IA] | 0.17  | 0.14  | 0.19  | 1.00 |
| b[16,IA] | 0.18  | 0.16  | 0.21  | 1.00 |
| b[17,IA] | 0.19  | 0.16  | 0.21  | 1.00 |
| b[18,IA] | 0.18  | 0.15  | 0.20  | 1.00 |
| b[19,IA] | 0.24  | 0.21  | 0.26  | 1.00 |
| b[20,IA] | 0.20  | 0.18  | 0.23  | 1.00 |
| b[21,IA] | 0.22  | 0.19  | 0.25  | 1.00 |
| b[1,ID]  | -0.15 | -0.18 | -0.12 | 1.00 |
| b[2,ID]  | 0.05  | 0.02  | 0.08  | 1.00 |
| b[3,ID]  | 0.10  | 0.07  | 0.12  | 1.00 |
| b[4,ID]  | 0.11  | 0.08  | 0.14  | 1.00 |
| b[5,ID]  | -0.09 | -0.12 | -0.07 | 1.00 |
| b[6,ID]  | 0.07  | 0.05  | 0.10  | 1.00 |
| b[7,ID]  | -0.17 | -0.20 | -0.14 | 1.00 |
| b[8,ID]  | -0.06 | -0.09 | -0.03 | 1.00 |
| b[9,ID]  | -0.16 | -0.19 | -0.14 | 1.00 |
| b[10,ID] | -0.17 | -0.20 | -0.15 | 1.00 |
| b[11,ID] | -0.16 | -0.18 | -0.13 | 1.00 |
| b[12,ID] | -0.16 | -0.19 | -0.14 | 1.00 |
| b[13,ID] | -0.17 | -0.20 | -0.15 | 1.00 |
| b[14,ID] | -0.16 | -0.18 | -0.13 | 1.00 |
| b[15,ID] | -0.16 | -0.19 | -0.13 | 1.00 |
| b[16,ID] | -0.14 | -0.17 | -0.11 | 1.00 |
| b[17,ID] | -0.14 | -0.17 | -0.11 | 1.00 |
| b[18,ID] | -0.14 | -0.17 | -0.11 | 1.00 |
| b[19,ID] | -0.15 | -0.18 | -0.13 | 1.00 |
| b[20,ID] | -0.16 | -0.19 | -0.14 | 1.00 |
| b[21,ID] | -0.15 | -0.18 | -0.12 | 1.00 |
| b[1,IL]  | 0.09  | 0.06  | 0.12  | 1.00 |
| b[2,IL]  | -0.24 | -0.26 | -0.21 | 1.00 |
| b[3,IL]  | -0.17 | -0.20 | -0.14 | 1.00 |
| b[4,IL]  | -0.31 | -0.33 | -0.28 | 1.00 |
| b[5,IL]  | -0.08 | -0.11 | -0.05 | 1.00 |
| b[6,IL]  | -0.19 | -0.22 | -0.17 | 1.00 |
| b[7,IL]  | -0.23 | -0.25 | -0.20 | 1.00 |

**Appendix**  
**Governor's Party, Policies, and COVID-19 Outcomes: Further Evidence of an Effect**  
**Shvetsova et al.**

|          |       |       |       |      |
|----------|-------|-------|-------|------|
| b[8,IL]  | -0.17 | -0.19 | -0.14 | 1.00 |
| b[9,IL]  | -0.11 | -0.14 | -0.08 | 1.00 |
| b[10,IL] | -0.19 | -0.22 | -0.17 | 1.00 |
| b[11,IL] | -0.19 | -0.21 | -0.16 | 1.00 |
| b[12,IL] | -0.08 | -0.11 | -0.05 | 1.00 |
| b[13,IL] | -0.14 | -0.17 | -0.11 | 1.00 |
| b[14,IL] | -0.10 | -0.13 | -0.07 | 1.00 |
| b[15,IL] | -0.10 | -0.13 | -0.08 | 1.00 |
| b[16,IL] | -0.23 | -0.25 | -0.20 | 1.00 |
| b[17,IL] | -0.17 | -0.20 | -0.15 | 1.00 |
| b[18,IL] | -0.20 | -0.22 | -0.17 | 1.00 |
| b[19,IL] | -0.20 | -0.23 | -0.17 | 1.00 |
| b[20,IL] | -0.22 | -0.25 | -0.20 | 1.00 |
| b[21,IL] | -0.20 | -0.22 | -0.17 | 1.00 |
| b[1,IN]  | -0.11 | -0.14 | -0.09 | 1.00 |
| b[2,IN]  | 0.04  | 0.01  | 0.07  | 1.00 |
| b[3,IN]  | -0.08 | -0.11 | -0.05 | 1.00 |
| b[4,IN]  | 0.02  | -0.01 | 0.05  | 1.00 |
| b[5,IN]  | -0.08 | -0.11 | -0.06 | 1.00 |
| b[6,IN]  | 0.05  | 0.02  | 0.08  | 1.00 |
| b[7,IN]  | 0.09  | 0.07  | 0.12  | 1.00 |
| b[8,IN]  | -0.01 | -0.04 | 0.02  | 1.00 |
| b[9,IN]  | 0.14  | 0.12  | 0.17  | 1.00 |
| b[10,IN] | 0.04  | 0.01  | 0.07  | 1.00 |
| b[11,IN] | 0.13  | 0.10  | 0.15  | 1.00 |
| b[12,IN] | 0.07  | 0.04  | 0.09  | 1.00 |
| b[13,IN] | 0.05  | 0.03  | 0.08  | 1.00 |
| b[14,IN] | 0.00  | -0.03 | 0.03  | 1.00 |
| b[15,IN] | 0.02  | 0.00  | 0.05  | 1.00 |
| b[16,IN] | 0.03  | 0.01  | 0.06  | 1.00 |
| b[17,IN] | 0.04  | 0.01  | 0.06  | 1.00 |
| b[18,IN] | 0.04  | 0.01  | 0.06  | 1.00 |
| b[19,IN] | 0.02  | -0.01 | 0.05  | 1.00 |
| b[20,IN] | 0.02  | -0.01 | 0.04  | 1.00 |
| b[21,IN] | 0.02  | -0.01 | 0.05  | 1.00 |
| b[1,KS]  | 0.00  | -0.03 | 0.03  | 1.00 |
| b[2,KS]  | -0.02 | -0.05 | 0.01  | 1.00 |
| b[3,KS]  | -0.04 | -0.07 | -0.01 | 1.00 |
| b[4,KS]  | -0.05 | -0.08 | -0.02 | 1.00 |
| b[5,KS]  | -0.08 | -0.10 | -0.05 | 1.00 |
| b[6,KS]  | 0.05  | 0.02  | 0.08  | 1.00 |
| b[7,KS]  | 0.02  | -0.01 | 0.05  | 1.00 |
| b[8,KS]  | 0.05  | 0.02  | 0.07  | 1.00 |
| b[9,KS]  | 0.08  | 0.05  | 0.11  | 1.00 |

**Appendix**  
**Governor's Party, Policies, and COVID-19 Outcomes: Further Evidence of an Effect**  
**Shvetsova et al.**

|          |       |       |       |      |
|----------|-------|-------|-------|------|
| b[10,KS] | 0.08  | 0.05  | 0.11  | 1.00 |
| b[11,KS] | 0.09  | 0.07  | 0.12  | 1.00 |
| b[12,KS] | 0.08  | 0.06  | 0.11  | 1.00 |
| b[13,KS] | 0.08  | 0.05  | 0.10  | 1.00 |
| b[14,KS] | 0.09  | 0.06  | 0.11  | 1.00 |
| b[15,KS] | 0.09  | 0.07  | 0.12  | 1.00 |
| b[16,KS] | 0.11  | 0.08  | 0.14  | 1.00 |
| b[17,KS] | 0.11  | 0.08  | 0.14  | 1.00 |
| b[18,KS] | 0.11  | 0.08  | 0.14  | 1.00 |
| b[19,KS] | 0.10  | 0.07  | 0.12  | 1.00 |
| b[20,KS] | 0.09  | 0.06  | 0.11  | 1.00 |
| b[21,KS] | 0.10  | 0.07  | 0.13  | 1.00 |
| b[1,KY]  | -0.06 | -0.09 | -0.03 | 1.00 |
| b[2,KY]  | -0.06 | -0.09 | -0.03 | 1.00 |
| b[3,KY]  | -0.03 | -0.06 | -0.01 | 1.00 |
| b[4,KY]  | -0.04 | -0.07 | -0.01 | 1.00 |
| b[5,KY]  | -0.10 | -0.12 | -0.07 | 1.00 |
| b[6,KY]  | -0.08 | -0.11 | -0.06 | 1.00 |
| b[7,KY]  | -0.03 | -0.06 | 0.00  | 1.00 |
| b[8,KY]  | -0.13 | -0.16 | -0.11 | 1.01 |
| b[9,KY]  | -0.02 | -0.05 | 0.00  | 1.00 |
| b[10,KY] | -0.09 | -0.12 | -0.07 | 1.00 |
| b[11,KY] | -0.05 | -0.08 | -0.02 | 1.00 |
| b[12,KY] | -0.07 | -0.09 | -0.04 | 1.00 |
| b[13,KY] | -0.08 | -0.10 | -0.05 | 1.00 |
| b[14,KY] | -0.05 | -0.07 | -0.02 | 1.00 |
| b[15,KY] | -0.07 | -0.10 | -0.05 | 1.00 |
| b[16,KY] | -0.18 | -0.20 | -0.15 | 1.00 |
| b[17,KY] | -0.12 | -0.15 | -0.10 | 1.00 |
| b[18,KY] | -0.15 | -0.17 | -0.12 | 1.00 |
| b[19,KY] | -0.15 | -0.18 | -0.12 | 1.00 |
| b[20,KY] | -0.17 | -0.20 | -0.15 | 1.00 |
| b[21,KY] | -0.14 | -0.17 | -0.12 | 1.00 |
| b[1,LA]  | -0.01 | -0.04 | 0.02  | 1.00 |
| b[2,LA]  | 0.06  | 0.03  | 0.09  | 1.00 |
| b[3,LA]  | -0.04 | -0.07 | -0.01 | 1.00 |
| b[4,LA]  | -0.01 | -0.04 | 0.01  | 1.00 |
| b[5,LA]  | -0.04 | -0.07 | -0.01 | 1.00 |
| b[6,LA]  | -0.02 | -0.04 | 0.01  | 1.00 |
| b[7,LA]  | 0.09  | 0.07  | 0.12  | 1.00 |
| b[8,LA]  | 0.01  | -0.02 | 0.03  | 1.00 |
| b[9,LA]  | 0.13  | 0.10  | 0.15  | 1.00 |
| b[10,LA] | 0.06  | 0.03  | 0.08  | 1.00 |
| b[11,LA] | 0.11  | 0.08  | 0.14  | 1.00 |

**Appendix**  
**Governor's Party, Policies, and COVID-19 Outcomes: Further Evidence of an Effect**  
**Shvetsova et al.**

|          |       |       |       |      |
|----------|-------|-------|-------|------|
| b[12,LA] | 0.01  | -0.01 | 0.04  | 1.00 |
| b[13,LA] | 0.04  | 0.01  | 0.06  | 1.00 |
| b[14,LA] | 0.04  | 0.01  | 0.06  | 1.00 |
| b[15,LA] | 0.04  | 0.02  | 0.07  | 1.00 |
| b[16,LA] | 0.06  | 0.03  | 0.09  | 1.00 |
| b[17,LA] | 0.06  | 0.03  | 0.09  | 1.00 |
| b[18,LA] | 0.06  | 0.03  | 0.09  | 1.00 |
| b[19,LA] | 0.04  | 0.02  | 0.07  | 1.00 |
| b[20,LA] | 0.04  | 0.02  | 0.07  | 1.00 |
| b[21,LA] | 0.04  | 0.01  | 0.07  | 1.00 |
| b[1,MA]  | 0.05  | 0.02  | 0.08  | 1.00 |
| b[2,MA]  | 0.02  | -0.01 | 0.05  | 1.00 |
| b[3,MA]  | -0.06 | -0.09 | -0.04 | 1.00 |
| b[4,MA]  | -0.03 | -0.06 | 0.00  | 1.00 |
| b[5,MA]  | -0.09 | -0.12 | -0.06 | 1.00 |
| b[6,MA]  | -0.01 | -0.04 | 0.02  | 1.00 |
| b[7,MA]  | 0.06  | 0.03  | 0.09  | 1.00 |
| b[8,MA]  | 0.08  | 0.05  | 0.11  | 1.00 |
| b[9,MA]  | 0.06  | 0.04  | 0.09  | 1.00 |
| b[10,MA] | 0.05  | 0.02  | 0.08  | 1.00 |
| b[11,MA] | 0.07  | 0.04  | 0.10  | 1.00 |
| b[12,MA] | 0.06  | 0.03  | 0.08  | 1.00 |
| b[13,MA] | 0.05  | 0.03  | 0.08  | 1.00 |
| b[14,MA] | 0.06  | 0.04  | 0.09  | 1.00 |
| b[15,MA] | 0.07  | 0.04  | 0.09  | 1.00 |
| b[16,MA] | 0.09  | 0.06  | 0.11  | 1.00 |
| b[17,MA] | 0.08  | 0.06  | 0.11  | 1.00 |
| b[18,MA] | 0.09  | 0.06  | 0.11  | 1.00 |
| b[19,MA] | 0.07  | 0.04  | 0.10  | 1.00 |
| b[20,MA] | 0.07  | 0.04  | 0.09  | 1.00 |
| b[21,MA] | 0.07  | 0.04  | 0.10  | 1.00 |
| b[1,MD]  | 0.26  | 0.23  | 0.28  | 1.00 |
| b[2,MD]  | -0.22 | -0.25 | -0.20 | 1.00 |
| b[3,MD]  | -0.07 | -0.10 | -0.05 | 1.00 |
| b[4,MD]  | -0.13 | -0.16 | -0.11 | 1.00 |
| b[5,MD]  | -0.16 | -0.18 | -0.13 | 1.00 |
| b[6,MD]  | -0.12 | -0.15 | -0.09 | 1.00 |
| b[7,MD]  | -0.08 | -0.11 | -0.06 | 1.00 |
| b[8,MD]  | -0.11 | -0.14 | -0.09 | 1.00 |
| b[9,MD]  | -0.10 | -0.13 | -0.08 | 1.00 |
| b[10,MD] | -0.13 | -0.15 | -0.10 | 1.00 |
| b[11,MD] | -0.10 | -0.13 | -0.08 | 1.00 |
| b[12,MD] | -0.12 | -0.14 | -0.09 | 1.00 |
| b[13,MD] | -0.12 | -0.15 | -0.10 | 1.00 |

**Appendix**  
**Governor's Party, Policies, and COVID-19 Outcomes: Further Evidence of an Effect**  
**Shvetsova et al.**

|          |       |       |       |      |
|----------|-------|-------|-------|------|
| b[14,MD] | -0.11 | -0.13 | -0.08 | 1.00 |
| b[15,MD] | -0.11 | -0.14 | -0.08 | 1.00 |
| b[16,MD] | -0.09 | -0.11 | -0.06 | 1.00 |
| b[17,MD] | -0.09 | -0.12 | -0.07 | 1.00 |
| b[18,MD] | -0.09 | -0.12 | -0.06 | 1.00 |
| b[19,MD] | -0.11 | -0.14 | -0.08 | 1.00 |
| b[20,MD] | -0.10 | -0.12 | -0.07 | 1.00 |
| b[21,MD] | -0.11 | -0.14 | -0.08 | 1.00 |
| b[1,ME]  | 0.33  | 0.30  | 0.35  | 1.00 |
| b[2,ME]  | -0.11 | -0.14 | -0.08 | 1.00 |
| b[3,ME]  | -0.02 | -0.05 | 0.01  | 1.00 |
| b[4,ME]  | 0.04  | 0.01  | 0.07  | 1.00 |
| b[5,ME]  | -0.09 | -0.12 | -0.06 | 1.00 |
| b[6,ME]  | -0.14 | -0.16 | -0.11 | 1.00 |
| b[7,ME]  | -0.04 | -0.06 | -0.01 | 1.00 |
| b[8,ME]  | -0.01 | -0.03 | 0.02  | 1.00 |
| b[9,ME]  | -0.09 | -0.11 | -0.06 | 1.00 |
| b[10,ME] | -0.11 | -0.13 | -0.08 | 1.00 |
| b[11,ME] | -0.07 | -0.09 | -0.04 | 1.00 |
| b[12,ME] | -0.12 | -0.15 | -0.09 | 1.00 |
| b[13,ME] | -0.04 | -0.07 | -0.02 | 1.00 |
| b[14,ME] | 0.05  | 0.02  | 0.07  | 1.00 |
| b[15,ME] | -0.01 | -0.04 | 0.02  | 1.00 |
| b[16,ME] | 0.07  | 0.04  | 0.09  | 1.00 |
| b[17,ME] | -0.01 | -0.04 | 0.01  | 1.00 |
| b[18,ME] | 0.10  | 0.08  | 0.13  | 1.00 |
| b[19,ME] | 0.12  | 0.09  | 0.15  | 1.00 |
| b[20,ME] | 0.19  | 0.16  | 0.21  | 1.00 |
| b[21,ME] | 0.06  | 0.03  | 0.08  | 1.00 |
| b[1,MI]  | -0.13 | -0.16 | -0.10 | 1.00 |
| b[2,MI]  | -0.13 | -0.16 | -0.10 | 1.00 |
| b[3,MI]  | 0.02  | -0.01 | 0.04  | 1.00 |
| b[4,MI]  | -0.08 | -0.11 | -0.05 | 1.00 |
| b[5,MI]  | -0.05 | -0.08 | -0.02 | 1.00 |
| b[6,MI]  | -0.07 | -0.10 | -0.05 | 1.00 |
| b[7,MI]  | -0.08 | -0.11 | -0.05 | 1.00 |
| b[8,MI]  | -0.12 | -0.15 | -0.09 | 1.00 |
| b[9,MI]  | -0.10 | -0.13 | -0.07 | 1.00 |
| b[10,MI] | -0.13 | -0.16 | -0.11 | 1.00 |
| b[11,MI] | -0.10 | -0.12 | -0.07 | 1.00 |
| b[12,MI] | -0.08 | -0.11 | -0.06 | 1.00 |
| b[13,MI] | -0.10 | -0.13 | -0.08 | 1.00 |
| b[14,MI] | -0.08 | -0.11 | -0.06 | 1.00 |
| b[15,MI] | -0.09 | -0.11 | -0.06 | 1.00 |

**Appendix**  
**Governor's Party, Policies, and COVID-19 Outcomes: Further Evidence of an Effect**  
**Shvetsova et al.**

|          |       |       |       |      |
|----------|-------|-------|-------|------|
| b[16,MI] | -0.06 | -0.09 | -0.04 | 1.00 |
| b[17,MI] | -0.07 | -0.09 | -0.04 | 1.00 |
| b[18,MI] | -0.06 | -0.09 | -0.03 | 1.00 |
| b[19,MI] | -0.08 | -0.11 | -0.05 | 1.00 |
| b[20,MI] | -0.08 | -0.11 | -0.06 | 1.00 |
| b[21,MI] | -0.08 | -0.11 | -0.05 | 1.00 |
| b[1,MN]  | 0.09  | 0.06  | 0.12  | 1.00 |
| b[2,MN]  | -0.09 | -0.11 | -0.06 | 1.00 |
| b[3,MN]  | -0.10 | -0.13 | -0.08 | 1.00 |
| b[4,MN]  | -0.17 | -0.20 | -0.14 | 1.00 |
| b[5,MN]  | 0.00  | -0.02 | 0.03  | 1.00 |
| b[6,MN]  | 0.08  | 0.06  | 0.11  | 1.00 |
| b[7,MN]  | -0.02 | -0.05 | 0.00  | 1.00 |
| b[8,MN]  | 0.05  | 0.02  | 0.08  | 1.00 |
| b[9,MN]  | -0.01 | -0.04 | 0.01  | 1.00 |
| b[10,MN] | 0.04  | 0.02  | 0.07  | 1.00 |
| b[11,MN] | -0.07 | -0.10 | -0.04 | 1.00 |
| b[12,MN] | -0.10 | -0.13 | -0.08 | 1.00 |
| b[13,MN] | -0.09 | -0.12 | -0.07 | 1.00 |
| b[14,MN] | -0.09 | -0.11 | -0.06 | 1.00 |
| b[15,MN] | -0.08 | -0.11 | -0.06 | 1.00 |
| b[16,MN] | -0.06 | -0.09 | -0.04 | 1.00 |
| b[17,MN] | -0.07 | -0.09 | -0.04 | 1.00 |
| b[18,MN] | -0.06 | -0.09 | -0.04 | 1.00 |
| b[19,MN] | -0.10 | -0.13 | -0.07 | 1.00 |
| b[20,MN] | -0.01 | -0.04 | 0.01  | 1.00 |
| b[21,MN] | -0.13 | -0.16 | -0.10 | 1.00 |
| b[1,MO]  | -0.04 | -0.07 | -0.01 | 1.00 |
| b[2,MO]  | 0.27  | 0.24  | 0.30  | 1.00 |
| b[3,MO]  | 0.12  | 0.09  | 0.15  | 1.00 |
| b[4,MO]  | 0.17  | 0.14  | 0.20  | 1.00 |
| b[5,MO]  | 0.13  | 0.11  | 0.16  | 1.00 |
| b[6,MO]  | 0.06  | 0.03  | 0.09  | 1.00 |
| b[7,MO]  | 0.10  | 0.07  | 0.13  | 1.00 |
| b[8,MO]  | 0.13  | 0.11  | 0.16  | 1.00 |
| b[9,MO]  | 0.11  | 0.08  | 0.14  | 1.00 |
| b[10,MO] | 0.18  | 0.15  | 0.21  | 1.00 |
| b[11,MO] | 0.14  | 0.12  | 0.17  | 1.00 |
| b[12,MO] | 0.13  | 0.10  | 0.15  | 1.00 |
| b[13,MO] | 0.14  | 0.11  | 0.16  | 1.00 |
| b[14,MO] | 0.12  | 0.10  | 0.15  | 1.00 |
| b[15,MO] | 0.18  | 0.15  | 0.21  | 1.00 |
| b[16,MO] | 0.06  | 0.04  | 0.09  | 1.00 |
| b[17,MO] | 0.05  | 0.03  | 0.08  | 1.00 |

**Appendix**  
**Governor's Party, Policies, and COVID-19 Outcomes: Further Evidence of an Effect**  
**Shvetsova et al.**

|          |       |       |      |      |
|----------|-------|-------|------|------|
| b[18,MO] | 0.07  | 0.04  | 0.09 | 1.00 |
| b[19,MO] | 0.05  | 0.02  | 0.07 | 1.00 |
| b[20,MO] | 0.02  | 0.00  | 0.05 | 1.00 |
| b[21,MO] | 0.06  | 0.03  | 0.09 | 1.00 |
| b[1,MS]  | 0.01  | -0.02 | 0.04 | 1.00 |
| b[2,MS]  | 0.39  | 0.36  | 0.41 | 1.00 |
| b[3,MS]  | 0.25  | 0.22  | 0.27 | 1.00 |
| b[4,MS]  | 0.25  | 0.22  | 0.28 | 1.00 |
| b[5,MS]  | 0.32  | 0.29  | 0.34 | 1.00 |
| b[6,MS]  | 0.15  | 0.12  | 0.18 | 1.00 |
| b[7,MS]  | 0.06  | 0.03  | 0.09 | 1.00 |
| b[8,MS]  | 0.15  | 0.12  | 0.18 | 1.00 |
| b[9,MS]  | 0.13  | 0.10  | 0.15 | 1.00 |
| b[10,MS] | 0.14  | 0.11  | 0.17 | 1.00 |
| b[11,MS] | 0.15  | 0.12  | 0.18 | 1.00 |
| b[12,MS] | 0.17  | 0.14  | 0.19 | 1.00 |
| b[13,MS] | 0.16  | 0.13  | 0.18 | 1.00 |
| b[14,MS] | 0.16  | 0.14  | 0.19 | 1.00 |
| b[15,MS] | 0.17  | 0.14  | 0.19 | 1.00 |
| b[16,MS] | 0.17  | 0.15  | 0.20 | 1.00 |
| b[17,MS] | 0.17  | 0.14  | 0.20 | 1.00 |
| b[18,MS] | 0.17  | 0.14  | 0.20 | 1.00 |
| b[19,MS] | 0.16  | 0.13  | 0.18 | 1.00 |
| b[20,MS] | 0.14  | 0.11  | 0.16 | 1.00 |
| b[21,MS] | 0.16  | 0.13  | 0.19 | 1.00 |
| b[1,MT]  | 0.05  | 0.02  | 0.08 | 1.00 |
| b[2,MT]  | 0.04  | 0.02  | 0.07 | 1.00 |
| b[3,MT]  | -0.01 | -0.04 | 0.01 | 1.00 |
| b[4,MT]  | 0.02  | 0.00  | 0.05 | 1.00 |
| b[5,MT]  | 0.14  | 0.11  | 0.17 | 1.00 |
| b[6,MT]  | -0.01 | -0.04 | 0.02 | 1.00 |
| b[7,MT]  | 0.10  | 0.07  | 0.12 | 1.00 |
| b[8,MT]  | 0.08  | 0.05  | 0.10 | 1.00 |
| b[9,MT]  | 0.15  | 0.13  | 0.18 | 1.00 |
| b[10,MT] | 0.02  | 0.00  | 0.05 | 1.00 |
| b[11,MT] | 0.02  | -0.01 | 0.04 | 1.00 |
| b[12,MT] | 0.05  | 0.02  | 0.07 | 1.00 |
| b[13,MT] | 0.03  | 0.00  | 0.06 | 1.00 |
| b[14,MT] | 0.04  | 0.02  | 0.07 | 1.00 |
| b[15,MT] | 0.04  | 0.01  | 0.07 | 1.00 |
| b[16,MT] | 0.05  | 0.02  | 0.07 | 1.00 |
| b[17,MT] | 0.05  | 0.02  | 0.07 | 1.00 |
| b[18,MT] | 0.04  | 0.02  | 0.07 | 1.00 |
| b[19,MT] | 0.03  | 0.00  | 0.06 | 1.00 |

**Appendix**  
**Governor's Party, Policies, and COVID-19 Outcomes: Further Evidence of an Effect**  
**Shvetsova et al.**

|          |       |       |       |      |
|----------|-------|-------|-------|------|
| b[20,MT] | 0.01  | -0.02 | 0.03  | 1.00 |
| b[21,MT] | 0.04  | 0.01  | 0.07  | 1.00 |
| b[1,NC]  | 0.03  | 0.00  | 0.06  | 1.00 |
| b[2,NC]  | -0.18 | -0.20 | -0.15 | 1.00 |
| b[3,NC]  | -0.16 | -0.18 | -0.13 | 1.00 |
| b[4,NC]  | -0.16 | -0.19 | -0.13 | 1.00 |
| b[5,NC]  | -0.16 | -0.19 | -0.14 | 1.00 |
| b[6,NC]  | -0.19 | -0.21 | -0.16 | 1.00 |
| b[7,NC]  | -0.12 | -0.15 | -0.09 | 1.00 |
| b[8,NC]  | -0.10 | -0.13 | -0.08 | 1.00 |
| b[9,NC]  | -0.08 | -0.11 | -0.06 | 1.00 |
| b[10,NC] | -0.09 | -0.12 | -0.07 | 1.00 |
| b[11,NC] | -0.07 | -0.10 | -0.04 | 1.00 |
| b[12,NC] | -0.06 | -0.09 | -0.03 | 1.00 |
| b[13,NC] | -0.07 | -0.09 | -0.04 | 1.00 |
| b[14,NC] | -0.06 | -0.09 | -0.03 | 1.00 |
| b[15,NC] | -0.06 | -0.08 | -0.03 | 1.00 |
| b[16,NC] | -0.05 | -0.08 | -0.03 | 1.00 |
| b[17,NC] | -0.05 | -0.08 | -0.03 | 1.00 |
| b[18,NC] | -0.06 | -0.08 | -0.03 | 1.00 |
| b[19,NC] | -0.07 | -0.10 | -0.05 | 1.00 |
| b[20,NC] | -0.08 | -0.10 | -0.05 | 1.00 |
| b[21,NC] | -0.07 | -0.10 | -0.04 | 1.00 |
| b[1,ND]  | 0.20  | 0.17  | 0.23  | 1.00 |
| b[2,ND]  | -0.21 | -0.24 | -0.18 | 1.00 |
| b[3,ND]  | -0.04 | -0.06 | -0.01 | 1.00 |
| b[4,ND]  | -0.16 | -0.19 | -0.13 | 1.00 |
| b[5,ND]  | -0.07 | -0.10 | -0.04 | 1.00 |
| b[6,ND]  | -0.13 | -0.16 | -0.11 | 1.00 |
| b[7,ND]  | -0.21 | -0.23 | -0.18 | 1.00 |
| b[8,ND]  | -0.13 | -0.16 | -0.11 | 1.00 |
| b[9,ND]  | -0.14 | -0.17 | -0.12 | 1.00 |
| b[10,ND] | -0.14 | -0.16 | -0.11 | 1.00 |
| b[11,ND] | -0.12 | -0.15 | -0.10 | 1.00 |
| b[12,ND] | -0.11 | -0.13 | -0.08 | 1.00 |
| b[13,ND] | -0.12 | -0.15 | -0.09 | 1.00 |
| b[14,ND] | -0.11 | -0.13 | -0.08 | 1.00 |
| b[15,ND] | -0.11 | -0.14 | -0.08 | 1.00 |
| b[16,ND] | -0.10 | -0.13 | -0.08 | 1.00 |
| b[17,ND] | -0.11 | -0.13 | -0.08 | 1.00 |
| b[18,ND] | -0.11 | -0.13 | -0.08 | 1.00 |
| b[19,ND] | -0.13 | -0.16 | -0.10 | 1.00 |
| b[20,ND] | -0.11 | -0.13 | -0.08 | 1.00 |
| b[21,ND] | -0.13 | -0.16 | -0.10 | 1.00 |

**Appendix**  
**Governor's Party, Policies, and COVID-19 Outcomes: Further Evidence of an Effect**  
**Shvetsova et al.**

|          |       |       |       |      |
|----------|-------|-------|-------|------|
| b[1,NE]  | -0.03 | -0.06 | -0.01 | 1.00 |
| b[2,NE]  | 0.07  | 0.04  | 0.10  | 1.00 |
| b[3,NE]  | 0.15  | 0.12  | 0.17  | 1.00 |
| b[4,NE]  | 0.11  | 0.08  | 0.14  | 1.00 |
| b[5,NE]  | 0.06  | 0.04  | 0.09  | 1.00 |
| b[6,NE]  | 0.13  | 0.10  | 0.15  | 1.00 |
| b[7,NE]  | 0.10  | 0.08  | 0.13  | 1.00 |
| b[8,NE]  | 0.13  | 0.10  | 0.16  | 1.00 |
| b[9,NE]  | 0.12  | 0.10  | 0.15  | 1.00 |
| b[10,NE] | 0.17  | 0.14  | 0.19  | 1.00 |
| b[11,NE] | 0.09  | 0.07  | 0.12  | 1.00 |
| b[12,NE] | 0.04  | 0.02  | 0.07  | 1.00 |
| b[13,NE] | 0.06  | 0.04  | 0.09  | 1.00 |
| b[14,NE] | 0.07  | 0.05  | 0.10  | 1.00 |
| b[15,NE] | 0.04  | 0.01  | 0.06  | 1.00 |
| b[16,NE] | 0.01  | -0.02 | 0.04  | 1.00 |
| b[17,NE] | 0.03  | 0.00  | 0.05  | 1.00 |
| b[18,NE] | 0.01  | -0.01 | 0.04  | 1.00 |
| b[19,NE] | 0.00  | -0.03 | 0.03  | 1.00 |
| b[20,NE] | 0.01  | -0.02 | 0.03  | 1.00 |
| b[21,NE] | 0.00  | -0.03 | 0.03  | 1.00 |
| b[1,NH]  | -0.09 | -0.12 | -0.06 | 1.00 |
| b[2,NH]  | -0.10 | -0.13 | -0.07 | 1.00 |
| b[3,NH]  | 0.05  | 0.02  | 0.07  | 1.00 |
| b[4,NH]  | 0.00  | -0.03 | 0.03  | 1.00 |
| b[5,NH]  | 0.01  | -0.01 | 0.04  | 1.00 |
| b[6,NH]  | 0.09  | 0.07  | 0.12  | 1.00 |
| b[7,NH]  | -0.04 | -0.06 | -0.01 | 1.00 |
| b[8,NH]  | 0.05  | 0.02  | 0.08  | 1.00 |
| b[9,NH]  | 0.00  | -0.02 | 0.03  | 1.00 |
| b[10,NH] | 0.01  | -0.02 | 0.04  | 1.00 |
| b[11,NH] | 0.03  | 0.00  | 0.05  | 1.00 |
| b[12,NH] | 0.04  | 0.01  | 0.07  | 1.00 |
| b[13,NH] | 0.03  | 0.01  | 0.06  | 1.00 |
| b[14,NH] | 0.04  | 0.01  | 0.06  | 1.00 |
| b[15,NH] | 0.04  | 0.02  | 0.07  | 1.00 |
| b[16,NH] | 0.12  | 0.09  | 0.14  | 1.00 |
| b[17,NH] | 0.09  | 0.06  | 0.11  | 1.00 |
| b[18,NH] | 0.10  | 0.07  | 0.13  | 1.00 |
| b[19,NH] | 0.07  | 0.05  | 0.10  | 1.00 |
| b[20,NH] | 0.08  | 0.05  | 0.10  | 1.00 |
| b[21,NH] | 0.08  | 0.05  | 0.11  | 1.00 |
| b[1,NJ]  | -0.05 | -0.08 | -0.02 | 1.00 |
| b[2,NJ]  | -0.23 | -0.26 | -0.20 | 1.00 |

**Appendix**  
**Governor's Party, Policies, and COVID-19 Outcomes: Further Evidence of an Effect**  
**Shvetsova et al.**

|          |       |       |       |      |
|----------|-------|-------|-------|------|
| b[3,NJ]  | -0.11 | -0.14 | -0.08 | 1.00 |
| b[4,NJ]  | -0.15 | -0.17 | -0.12 | 1.00 |
| b[5,NJ]  | -0.19 | -0.22 | -0.16 | 1.00 |
| b[6,NJ]  | -0.13 | -0.16 | -0.10 | 1.00 |
| b[7,NJ]  | -0.12 | -0.14 | -0.09 | 1.00 |
| b[8,NJ]  | -0.10 | -0.13 | -0.07 | 1.00 |
| b[9,NJ]  | -0.20 | -0.22 | -0.17 | 1.00 |
| b[10,NJ] | -0.23 | -0.26 | -0.21 | 1.00 |
| b[11,NJ] | -0.17 | -0.20 | -0.15 | 1.00 |
| b[12,NJ] | -0.23 | -0.25 | -0.20 | 1.00 |
| b[13,NJ] | -0.10 | -0.13 | -0.08 | 1.00 |
| b[14,NJ] | -0.08 | -0.11 | -0.05 | 1.00 |
| b[15,NJ] | -0.07 | -0.10 | -0.05 | 1.00 |
| b[16,NJ] | -0.14 | -0.16 | -0.11 | 1.00 |
| b[17,NJ] | -0.12 | -0.15 | -0.10 | 1.00 |
| b[18,NJ] | -0.15 | -0.18 | -0.12 | 1.00 |
| b[19,NJ] | -0.11 | -0.14 | -0.08 | 1.00 |
| b[20,NJ] | -0.08 | -0.11 | -0.06 | 1.00 |
| b[21,NJ] | -0.10 | -0.13 | -0.07 | 1.00 |
| b[1,NM]  | -0.11 | -0.14 | -0.08 | 1.00 |
| b[2,NM]  | -0.14 | -0.16 | -0.11 | 1.00 |
| b[3,NM]  | -0.21 | -0.24 | -0.19 | 1.00 |
| b[4,NM]  | -0.08 | -0.11 | -0.05 | 1.00 |
| b[5,NM]  | -0.12 | -0.15 | -0.09 | 1.00 |
| b[6,NM]  | -0.07 | -0.09 | -0.04 | 1.00 |
| b[7,NM]  | -0.04 | -0.06 | -0.01 | 1.00 |
| b[8,NM]  | -0.34 | -0.37 | -0.31 | 1.00 |
| b[9,NM]  | -0.23 | -0.26 | -0.21 | 1.00 |
| b[10,NM] | -0.28 | -0.31 | -0.25 | 1.00 |
| b[11,NM] | -0.24 | -0.27 | -0.21 | 1.00 |
| b[12,NM] | -0.24 | -0.27 | -0.21 | 1.00 |
| b[13,NM] | -0.24 | -0.27 | -0.21 | 1.00 |
| b[14,NM] | -0.23 | -0.26 | -0.21 | 1.00 |
| b[15,NM] | -0.23 | -0.26 | -0.21 | 1.00 |
| b[16,NM] | -0.23 | -0.25 | -0.20 | 1.00 |
| b[17,NM] | -0.24 | -0.26 | -0.21 | 1.00 |
| b[18,NM] | -0.12 | -0.15 | -0.09 | 1.00 |
| b[19,NM] | -0.10 | -0.13 | -0.07 | 1.00 |
| b[20,NM] | -0.07 | -0.09 | -0.04 | 1.00 |
| b[21,NM] | -0.07 | -0.10 | -0.04 | 1.00 |
| b[1,NV]  | -0.19 | -0.22 | -0.16 | 1.00 |
| b[2,NV]  | 0.37  | 0.34  | 0.40  | 1.00 |
| b[3,NV]  | 0.12  | 0.10  | 0.15  | 1.00 |
| b[4,NV]  | 0.28  | 0.25  | 0.30  | 1.00 |

**Appendix**  
**Governor's Party, Policies, and COVID-19 Outcomes: Further Evidence of an Effect**  
**Shvetsova et al.**

|          |       |       |       |      |
|----------|-------|-------|-------|------|
| b[5,NV]  | 0.06  | 0.03  | 0.08  | 1.00 |
| b[6,NV]  | 0.07  | 0.05  | 0.10  | 1.00 |
| b[7,NV]  | 0.05  | 0.02  | 0.07  | 1.00 |
| b[8,NV]  | 0.10  | 0.07  | 0.12  | 1.00 |
| b[9,NV]  | 0.06  | 0.03  | 0.08  | 1.00 |
| b[10,NV] | 0.02  | 0.00  | 0.05  | 1.00 |
| b[11,NV] | 0.06  | 0.03  | 0.09  | 1.00 |
| b[12,NV] | 0.06  | 0.03  | 0.09  | 1.00 |
| b[13,NV] | 0.06  | 0.03  | 0.09  | 1.00 |
| b[14,NV] | 0.06  | 0.04  | 0.09  | 1.00 |
| b[15,NV] | 0.07  | 0.04  | 0.10  | 1.00 |
| b[16,NV] | 0.07  | 0.04  | 0.10  | 1.00 |
| b[17,NV] | 0.07  | 0.05  | 0.10  | 1.00 |
| b[18,NV] | 0.07  | 0.04  | 0.10  | 1.00 |
| b[19,NV] | 0.04  | 0.01  | 0.07  | 1.00 |
| b[20,NV] | 0.09  | 0.06  | 0.11  | 1.00 |
| b[21,NV] | 0.03  | 0.00  | 0.06  | 1.00 |
| b[1,NY]  | -0.06 | -0.09 | -0.04 | 1.00 |
| b[2,NY]  | 0.10  | 0.07  | 0.13  | 1.00 |
| b[3,NY]  | -0.07 | -0.09 | -0.04 | 1.00 |
| b[4,NY]  | -0.04 | -0.06 | -0.01 | 1.00 |
| b[5,NY]  | 0.04  | 0.02  | 0.07  | 1.00 |
| b[6,NY]  | 0.04  | 0.01  | 0.07  | 1.00 |
| b[7,NY]  | 0.12  | 0.10  | 0.15  | 1.00 |
| b[8,NY]  | 0.09  | 0.06  | 0.12  | 1.00 |
| b[9,NY]  | -0.03 | -0.05 | 0.00  | 1.00 |
| b[10,NY] | 0.03  | 0.00  | 0.06  | 1.00 |
| b[11,NY] | 0.02  | -0.01 | 0.04  | 1.00 |
| b[12,NY] | 0.04  | 0.02  | 0.07  | 1.00 |
| b[13,NY] | 0.03  | 0.01  | 0.06  | 1.00 |
| b[14,NY] | 0.04  | 0.01  | 0.06  | 1.00 |
| b[15,NY] | 0.04  | 0.02  | 0.07  | 1.00 |
| b[16,NY] | 0.05  | 0.02  | 0.07  | 1.00 |
| b[17,NY] | 0.05  | 0.02  | 0.07  | 1.00 |
| b[18,NY] | 0.04  | 0.02  | 0.07  | 1.00 |
| b[19,NY] | 0.03  | 0.00  | 0.05  | 1.00 |
| b[20,NY] | 0.03  | 0.01  | 0.06  | 1.00 |
| b[21,NY] | 0.03  | 0.00  | 0.06  | 1.00 |
| b[1,OH]  | 0.16  | 0.13  | 0.19  | 1.00 |
| b[2,OH]  | 0.11  | 0.08  | 0.14  | 1.00 |
| b[3,OH]  | -0.09 | -0.11 | -0.06 | 1.00 |
| b[4,OH]  | 0.06  | 0.03  | 0.09  | 1.00 |
| b[5,OH]  | -0.02 | -0.05 | 0.00  | 1.00 |
| b[6,OH]  | 0.04  | 0.02  | 0.07  | 1.00 |

**Appendix**  
**Governor's Party, Policies, and COVID-19 Outcomes: Further Evidence of an Effect**  
**Shvetsova et al.**

|          |       |       |       |      |
|----------|-------|-------|-------|------|
| b[7,OH]  | 0.06  | 0.03  | 0.09  | 1.00 |
| b[8,OH]  | 0.12  | 0.10  | 0.15  | 1.00 |
| b[9,OH]  | 0.08  | 0.05  | 0.10  | 1.00 |
| b[10,OH] | 0.08  | 0.06  | 0.11  | 1.00 |
| b[11,OH] | 0.12  | 0.10  | 0.15  | 1.00 |
| b[12,OH] | 0.14  | 0.11  | 0.17  | 1.00 |
| b[13,OH] | 0.14  | 0.11  | 0.17  | 1.00 |
| b[14,OH] | 0.07  | 0.05  | 0.10  | 1.00 |
| b[15,OH] | 0.09  | 0.07  | 0.12  | 1.00 |
| b[16,OH] | 0.11  | 0.08  | 0.14  | 1.00 |
| b[17,OH] | 0.04  | 0.01  | 0.07  | 1.00 |
| b[18,OH] | 0.05  | 0.02  | 0.07  | 1.00 |
| b[19,OH] | 0.02  | -0.01 | 0.05  | 1.00 |
| b[20,OH] | 0.05  | 0.03  | 0.08  | 1.00 |
| b[21,OH] | 0.02  | -0.01 | 0.04  | 1.00 |
| b[1,OK]  | -0.01 | -0.04 | 0.02  | 1.00 |
| b[2,OK]  | -0.42 | -0.44 | -0.39 | 1.00 |
| b[3,OK]  | 0.00  | -0.03 | 0.03  | 1.00 |
| b[4,OK]  | -0.15 | -0.18 | -0.13 | 1.00 |
| b[5,OK]  | -0.13 | -0.16 | -0.11 | 1.00 |
| b[6,OK]  | -0.12 | -0.15 | -0.09 | 1.00 |
| b[7,OK]  | -0.09 | -0.11 | -0.06 | 1.00 |
| b[8,OK]  | -0.01 | -0.04 | 0.02  | 1.00 |
| b[9,OK]  | 0.05  | 0.03  | 0.08  | 1.00 |
| b[10,OK] | -0.10 | -0.13 | -0.07 | 1.00 |
| b[11,OK] | -0.07 | -0.10 | -0.05 | 1.00 |
| b[12,OK] | -0.06 | -0.09 | -0.03 | 1.00 |
| b[13,OK] | -0.07 | -0.10 | -0.04 | 1.00 |
| b[14,OK] | -0.06 | -0.08 | -0.03 | 1.00 |
| b[15,OK] | -0.06 | -0.09 | -0.03 | 1.00 |
| b[16,OK] | -0.05 | -0.08 | -0.02 | 1.00 |
| b[17,OK] | -0.06 | -0.09 | -0.03 | 1.00 |
| b[18,OK] | -0.04 | -0.07 | -0.02 | 1.00 |
| b[19,OK] | -0.10 | -0.12 | -0.07 | 1.00 |
| b[20,OK] | -0.12 | -0.15 | -0.10 | 1.00 |
| b[21,OK] | -0.13 | -0.16 | -0.10 | 1.00 |
| b[1,OR]  | -0.15 | -0.18 | -0.12 | 1.00 |
| b[2,OR]  | 0.05  | 0.02  | 0.08  | 1.00 |
| b[3,OR]  | -0.02 | -0.05 | 0.01  | 1.00 |
| b[4,OR]  | 0.02  | -0.01 | 0.05  | 1.00 |
| b[5,OR]  | -0.08 | -0.11 | -0.05 | 1.00 |
| b[6,OR]  | -0.04 | -0.06 | -0.01 | 1.00 |
| b[7,OR]  | -0.17 | -0.20 | -0.14 | 1.00 |
| b[8,OR]  | -0.19 | -0.21 | -0.16 | 1.00 |

**Appendix**  
**Governor's Party, Policies, and COVID-19 Outcomes: Further Evidence of an Effect**  
**Shvetsova et al.**

|          |       |       |       |      |
|----------|-------|-------|-------|------|
| b[9,OR]  | -0.17 | -0.19 | -0.14 | 1.00 |
| b[10,OR] | -0.07 | -0.10 | -0.04 | 1.00 |
| b[11,OR] | -0.08 | -0.11 | -0.06 | 1.00 |
| b[12,OR] | -0.06 | -0.08 | -0.03 | 1.00 |
| b[13,OR] | -0.07 | -0.10 | -0.05 | 1.00 |
| b[14,OR] | -0.06 | -0.08 | -0.03 | 1.00 |
| b[15,OR] | -0.06 | -0.08 | -0.03 | 1.00 |
| b[16,OR] | -0.12 | -0.15 | -0.10 | 1.00 |
| b[17,OR] | -0.09 | -0.12 | -0.07 | 1.00 |
| b[18,OR] | -0.11 | -0.14 | -0.08 | 1.00 |
| b[19,OR] | -0.12 | -0.15 | -0.09 | 1.00 |
| b[20,OR] | -0.12 | -0.14 | -0.09 | 1.00 |
| b[21,OR] | -0.12 | -0.15 | -0.09 | 1.00 |
| b[1,PA]  | 0.20  | 0.17  | 0.23  | 1.00 |
| b[2,PA]  | 0.00  | -0.03 | 0.03  | 1.00 |
| b[3,PA]  | -0.12 | -0.15 | -0.10 | 1.00 |
| b[4,PA]  | -0.02 | -0.05 | 0.00  | 1.00 |
| b[5,PA]  | -0.39 | -0.42 | -0.36 | 1.00 |
| b[6,PA]  | -0.14 | -0.17 | -0.11 | 1.00 |
| b[7,PA]  | -0.41 | -0.44 | -0.38 | 1.00 |
| b[8,PA]  | -0.30 | -0.33 | -0.27 | 1.00 |
| b[9,PA]  | -0.32 | -0.35 | -0.29 | 1.00 |
| b[10,PA] | -0.31 | -0.34 | -0.29 | 1.00 |
| b[11,PA] | -0.30 | -0.33 | -0.27 | 1.00 |
| b[12,PA] | -0.29 | -0.31 | -0.26 | 1.00 |
| b[13,PA] | -0.29 | -0.32 | -0.27 | 1.00 |
| b[14,PA] | -0.28 | -0.31 | -0.26 | 1.00 |
| b[15,PA] | -0.28 | -0.31 | -0.25 | 1.00 |
| b[16,PA] | -0.28 | -0.31 | -0.25 | 1.00 |
| b[17,PA] | -0.27 | -0.30 | -0.25 | 1.00 |
| b[18,PA] | -0.30 | -0.33 | -0.27 | 1.00 |
| b[19,PA] | -0.20 | -0.22 | -0.17 | 1.00 |
| b[20,PA] | -0.24 | -0.26 | -0.21 | 1.00 |
| b[21,PA] | -0.22 | -0.25 | -0.19 | 1.00 |
| b[1,RI]  | 0.03  | 0.01  | 0.06  | 1.00 |
| b[2,RI]  | -0.09 | -0.12 | -0.06 | 1.00 |
| b[3,RI]  | -0.21 | -0.24 | -0.19 | 1.00 |
| b[4,RI]  | -0.17 | -0.20 | -0.14 | 1.00 |
| b[5,RI]  | -0.20 | -0.22 | -0.17 | 1.00 |
| b[6,RI]  | -0.11 | -0.13 | -0.08 | 1.00 |
| b[7,RI]  | -0.20 | -0.22 | -0.17 | 1.00 |
| b[8,RI]  | -0.14 | -0.17 | -0.11 | 1.00 |
| b[9,RI]  | -0.14 | -0.16 | -0.11 | 1.00 |
| b[10,RI] | -0.14 | -0.17 | -0.12 | 1.00 |

**Appendix**  
**Governor's Party, Policies, and COVID-19 Outcomes: Further Evidence of an Effect**  
**Shvetsova et al.**

|          |       |       |       |      |
|----------|-------|-------|-------|------|
| b[11,RI] | -0.12 | -0.15 | -0.09 | 1.00 |
| b[12,RI] | -0.11 | -0.14 | -0.09 | 1.00 |
| b[13,RI] | -0.12 | -0.14 | -0.09 | 1.00 |
| b[14,RI] | -0.11 | -0.14 | -0.09 | 1.00 |
| b[15,RI] | -0.11 | -0.13 | -0.08 | 1.00 |
| b[16,RI] | -0.10 | -0.13 | -0.08 | 1.00 |
| b[17,RI] | -0.10 | -0.13 | -0.08 | 1.00 |
| b[18,RI] | -0.11 | -0.13 | -0.08 | 1.00 |
| b[19,RI] | -0.12 | -0.15 | -0.09 | 1.00 |
| b[20,RI] | -0.14 | -0.16 | -0.11 | 1.00 |
| b[21,RI] | -0.11 | -0.14 | -0.08 | 1.00 |
| b[1,SC]  | 0.02  | -0.01 | 0.05  | 1.00 |
| b[2,SC]  | 0.13  | 0.10  | 0.16  | 1.00 |
| b[3,SC]  | -0.01 | -0.04 | 0.01  | 1.00 |
| b[4,SC]  | 0.03  | 0.00  | 0.05  | 1.00 |
| b[5,SC]  | -0.04 | -0.07 | -0.02 | 1.00 |
| b[6,SC]  | 0.00  | -0.02 | 0.03  | 1.00 |
| b[7,SC]  | 0.08  | 0.05  | 0.11  | 1.00 |
| b[8,SC]  | -0.05 | -0.07 | -0.02 | 1.00 |
| b[9,SC]  | 0.01  | -0.02 | 0.04  | 1.00 |
| b[10,SC] | -0.07 | -0.10 | -0.05 | 1.00 |
| b[11,SC] | -0.05 | -0.07 | -0.02 | 1.00 |
| b[12,SC] | -0.04 | -0.06 | -0.01 | 1.00 |
| b[13,SC] | -0.04 | -0.07 | -0.02 | 1.00 |
| b[14,SC] | -0.04 | -0.06 | -0.01 | 1.00 |
| b[15,SC] | -0.03 | -0.06 | 0.00  | 1.00 |
| b[16,SC] | -0.03 | -0.06 | -0.01 | 1.00 |
| b[17,SC] | -0.02 | -0.05 | 0.01  | 1.00 |
| b[18,SC] | -0.06 | -0.09 | -0.03 | 1.00 |
| b[19,SC] | 0.04  | 0.01  | 0.07  | 1.00 |
| b[20,SC] | 0.02  | -0.01 | 0.04  | 1.00 |
| b[21,SC] | 0.03  | 0.01  | 0.06  | 1.00 |
| b[1,SD]  | 0.12  | 0.09  | 0.15  | 1.00 |
| b[2,SD]  | 0.04  | 0.01  | 0.06  | 1.00 |
| b[3,SD]  | -0.06 | -0.09 | -0.03 | 1.00 |
| b[4,SD]  | -0.13 | -0.16 | -0.10 | 1.00 |
| b[5,SD]  | 0.22  | 0.19  | 0.25  | 1.00 |
| b[6,SD]  | -0.14 | -0.17 | -0.11 | 1.00 |
| b[7,SD]  | -0.04 | -0.07 | -0.02 | 1.00 |
| b[8,SD]  | -0.16 | -0.19 | -0.13 | 1.00 |
| b[9,SD]  | -0.12 | -0.15 | -0.10 | 1.00 |
| b[10,SD] | -0.13 | -0.16 | -0.10 | 1.00 |
| b[11,SD] | -0.05 | -0.07 | -0.02 | 1.00 |
| b[12,SD] | -0.14 | -0.16 | -0.11 | 1.00 |

**Appendix**  
**Governor's Party, Policies, and COVID-19 Outcomes: Further Evidence of an Effect**  
**Shvetsova et al.**

|          |       |       |       |      |
|----------|-------|-------|-------|------|
| b[13,SD] | -0.18 | -0.21 | -0.16 | 1.00 |
| b[14,SD] | -0.15 | -0.18 | -0.12 | 1.00 |
| b[15,SD] | -0.16 | -0.19 | -0.14 | 1.00 |
| b[16,SD] | -0.15 | -0.18 | -0.12 | 1.00 |
| b[17,SD] | -0.16 | -0.18 | -0.13 | 1.00 |
| b[18,SD] | -0.15 | -0.18 | -0.13 | 1.00 |
| b[19,SD] | -0.17 | -0.20 | -0.15 | 1.00 |
| b[20,SD] | -0.18 | -0.20 | -0.15 | 1.00 |
| b[21,SD] | -0.17 | -0.20 | -0.14 | 1.00 |
| b[1,TN]  | 0.01  | -0.01 | 0.04  | 1.00 |
| b[2,TN]  | -0.10 | -0.13 | -0.07 | 1.00 |
| b[3,TN]  | 0.11  | 0.08  | 0.14  | 1.00 |
| b[4,TN]  | 0.07  | 0.04  | 0.10  | 1.00 |
| b[5,TN]  | 0.10  | 0.07  | 0.12  | 1.00 |
| b[6,TN]  | 0.16  | 0.13  | 0.19  | 1.00 |
| b[7,TN]  | 0.19  | 0.16  | 0.22  | 1.00 |
| b[8,TN]  | 0.23  | 0.20  | 0.26  | 1.00 |
| b[9,TN]  | 0.15  | 0.12  | 0.17  | 1.00 |
| b[10,TN] | 0.37  | 0.35  | 0.40  | 1.00 |
| b[11,TN] | -0.03 | -0.06 | -0.01 | 1.00 |
| b[12,TN] | -0.10 | -0.12 | -0.07 | 1.00 |
| b[13,TN] | -0.05 | -0.07 | -0.02 | 1.00 |
| b[14,TN] | -0.07 | -0.10 | -0.04 | 1.00 |
| b[15,TN] | -0.05 | -0.08 | -0.02 | 1.00 |
| b[16,TN] | -0.06 | -0.08 | -0.03 | 1.00 |
| b[17,TN] | -0.05 | -0.08 | -0.03 | 1.00 |
| b[18,TN] | -0.06 | -0.09 | -0.03 | 1.00 |
| b[19,TN] | -0.07 | -0.10 | -0.04 | 1.00 |
| b[20,TN] | -0.08 | -0.11 | -0.06 | 1.00 |
| b[21,TN] | -0.06 | -0.09 | -0.03 | 1.00 |
| b[1,TX]  | 0.05  | 0.02  | 0.08  | 1.00 |
| b[2,TX]  | -0.05 | -0.08 | -0.03 | 1.00 |
| b[3,TX]  | 0.30  | 0.27  | 0.33  | 1.00 |
| b[4,TX]  | 0.15  | 0.12  | 0.18  | 1.00 |
| b[5,TX]  | 0.30  | 0.27  | 0.33  | 1.00 |
| b[6,TX]  | 0.07  | 0.04  | 0.09  | 1.00 |
| b[7,TX]  | 0.16  | 0.13  | 0.19  | 1.00 |
| b[8,TX]  | 0.14  | 0.11  | 0.17  | 1.00 |
| b[9,TX]  | 0.17  | 0.14  | 0.19  | 1.00 |
| b[10,TX] | 0.16  | 0.13  | 0.19  | 1.00 |
| b[11,TX] | 0.18  | 0.15  | 0.20  | 1.00 |
| b[12,TX] | 0.19  | 0.16  | 0.22  | 1.00 |
| b[13,TX] | 0.18  | 0.16  | 0.21  | 1.00 |
| b[14,TX] | 0.19  | 0.16  | 0.22  | 1.00 |

**Appendix**  
**Governor's Party, Policies, and COVID-19 Outcomes: Further Evidence of an Effect**  
**Shvetsova et al.**

|           |       |       |       |      |
|-----------|-------|-------|-------|------|
| b[15, TX] | 0.19  | 0.16  | 0.22  | 1.00 |
| b[16, TX] | 0.20  | 0.17  | 0.22  | 1.00 |
| b[17, TX] | 0.19  | 0.17  | 0.22  | 1.00 |
| b[18, TX] | 0.20  | 0.17  | 0.22  | 1.00 |
| b[19, TX] | 0.18  | 0.15  | 0.21  | 1.00 |
| b[20, TX] | 0.16  | 0.14  | 0.19  | 1.00 |
| b[21, TX] | 0.19  | 0.16  | 0.22  | 1.00 |
| b[1, UT]  | 0.02  | -0.01 | 0.05  | 1.00 |
| b[2, UT]  | -0.27 | -0.30 | -0.25 | 1.00 |
| b[3, UT]  | -0.08 | -0.11 | -0.05 | 1.00 |
| b[4, UT]  | -0.13 | -0.16 | -0.10 | 1.00 |
| b[5, UT]  | -0.10 | -0.12 | -0.07 | 1.00 |
| b[6, UT]  | -0.07 | -0.10 | -0.04 | 1.00 |
| b[7, UT]  | -0.03 | -0.05 | 0.00  | 1.00 |
| b[8, UT]  | 0.00  | -0.02 | 0.03  | 1.00 |
| b[9, UT]  | 0.01  | -0.01 | 0.04  | 1.00 |
| b[10, UT] | 0.01  | -0.02 | 0.04  | 1.00 |
| b[11, UT] | 0.03  | 0.00  | 0.05  | 1.00 |
| b[12, UT] | 0.04  | 0.01  | 0.07  | 1.00 |
| b[13, UT] | 0.03  | 0.01  | 0.06  | 1.00 |
| b[14, UT] | 0.04  | 0.01  | 0.07  | 1.00 |
| b[15, UT] | 0.04  | 0.02  | 0.07  | 1.00 |
| b[16, UT] | 0.05  | 0.02  | 0.07  | 1.00 |
| b[17, UT] | 0.05  | 0.02  | 0.07  | 1.00 |
| b[18, UT] | 0.04  | 0.02  | 0.07  | 1.00 |
| b[19, UT] | 0.03  | 0.00  | 0.06  | 1.00 |
| b[20, UT] | 0.02  | 0.00  | 0.05  | 1.00 |
| b[21, UT] | 0.03  | 0.00  | 0.06  | 1.00 |
| b[1, VA]  | -0.01 | -0.03 | 0.02  | 1.00 |
| b[2, VA]  | -0.01 | -0.03 | 0.02  | 1.00 |
| b[3, VA]  | -0.03 | -0.05 | 0.00  | 1.00 |
| b[4, VA]  | -0.05 | -0.08 | -0.02 | 1.00 |
| b[5, VA]  | -0.02 | -0.05 | 0.01  | 1.00 |
| b[6, VA]  | 0.00  | -0.02 | 0.03  | 1.00 |
| b[7, VA]  | 0.05  | 0.02  | 0.08  | 1.00 |
| b[8, VA]  | 0.07  | 0.05  | 0.10  | 1.00 |
| b[9, VA]  | 0.10  | 0.07  | 0.12  | 1.00 |
| b[10, VA] | 0.07  | 0.04  | 0.09  | 1.00 |
| b[11, VA] | 0.14  | 0.11  | 0.17  | 1.00 |
| b[12, VA] | 0.18  | 0.16  | 0.21  | 1.00 |
| b[13, VA] | 0.13  | 0.10  | 0.15  | 1.00 |
| b[14, VA] | 0.10  | 0.07  | 0.13  | 1.00 |
| b[15, VA] | 0.13  | 0.10  | 0.16  | 1.00 |
| b[16, VA] | 0.10  | 0.08  | 0.13  | 1.00 |

**Appendix**  
**Governor's Party, Policies, and COVID-19 Outcomes: Further Evidence of an Effect**  
**Shvetsova et al.**

|          |       |       |       |      |
|----------|-------|-------|-------|------|
| b[17,VA] | 0.17  | 0.15  | 0.20  | 1.00 |
| b[18,VA] | 0.17  | 0.14  | 0.20  | 1.00 |
| b[19,VA] | 0.14  | 0.11  | 0.17  | 1.00 |
| b[20,VA] | 0.19  | 0.16  | 0.21  | 1.00 |
| b[21,VA] | 0.13  | 0.10  | 0.16  | 1.00 |
| b[1,VT]  | -0.08 | -0.11 | -0.05 | 1.00 |
| b[2,VT]  | 0.10  | 0.07  | 0.13  | 1.00 |
| b[3,VT]  | 0.00  | -0.02 | 0.03  | 1.00 |
| b[4,VT]  | 0.00  | -0.02 | 0.03  | 1.00 |
| b[5,VT]  | 0.05  | 0.02  | 0.07  | 1.00 |
| b[6,VT]  | 0.01  | -0.02 | 0.03  | 1.00 |
| b[7,VT]  | 0.07  | 0.04  | 0.10  | 1.00 |
| b[8,VT]  | 0.01  | -0.02 | 0.04  | 1.00 |
| b[9,VT]  | -0.03 | -0.06 | -0.01 | 1.00 |
| b[10,VT] | 0.00  | -0.03 | 0.02  | 1.00 |
| b[11,VT] | 0.00  | -0.03 | 0.02  | 1.00 |
| b[12,VT] | 0.02  | -0.01 | 0.04  | 1.00 |
| b[13,VT] | 0.01  | -0.02 | 0.03  | 1.00 |
| b[14,VT] | 0.02  | -0.01 | 0.04  | 1.00 |
| b[15,VT] | -0.08 | -0.11 | -0.06 | 1.00 |
| b[16,VT] | -0.04 | -0.07 | -0.02 | 1.00 |
| b[17,VT] | -0.06 | -0.08 | -0.03 | 1.00 |
| b[18,VT] | -0.05 | -0.08 | -0.03 | 1.00 |
| b[19,VT] | -0.07 | -0.10 | -0.04 | 1.00 |
| b[20,VT] | -0.08 | -0.10 | -0.05 | 1.00 |
| b[21,VT] | -0.06 | -0.09 | -0.03 | 1.00 |
| b[1,WA]  | -0.07 | -0.10 | -0.04 | 1.00 |
| b[2,WA]  | 0.10  | 0.07  | 0.13  | 1.00 |
| b[3,WA]  | 0.14  | 0.11  | 0.17  | 1.00 |
| b[4,WA]  | 0.09  | 0.07  | 0.12  | 1.00 |
| b[5,WA]  | 0.13  | 0.10  | 0.16  | 1.00 |
| b[6,WA]  | 0.16  | 0.13  | 0.18  | 1.00 |
| b[7,WA]  | 0.19  | 0.17  | 0.22  | 1.00 |
| b[8,WA]  | 0.24  | 0.21  | 0.27  | 1.00 |
| b[9,WA]  | 0.22  | 0.19  | 0.25  | 1.00 |
| b[10,WA] | 0.27  | 0.24  | 0.29  | 1.00 |
| b[11,WA] | 0.19  | 0.17  | 0.22  | 1.00 |
| b[12,WA] | 0.14  | 0.11  | 0.17  | 1.00 |
| b[13,WA] | 0.17  | 0.14  | 0.20  | 1.00 |
| b[14,WA] | 0.16  | 0.13  | 0.18  | 1.00 |
| b[15,WA] | 0.17  | 0.14  | 0.19  | 1.00 |
| b[16,WA] | 0.18  | 0.15  | 0.20  | 1.00 |
| b[17,WA] | 0.16  | 0.14  | 0.19  | 1.00 |
| b[18,WA] | 0.18  | 0.15  | 0.21  | 1.00 |

**Appendix**  
**Governor's Party, Policies, and COVID-19 Outcomes: Further Evidence of an Effect**  
**Shvetsova et al.**

|          |       |       |       |      |
|----------|-------|-------|-------|------|
| b[19,WA] | 0.24  | 0.22  | 0.27  | 1.00 |
| b[20,WA] | 0.26  | 0.23  | 0.28  | 1.00 |
| b[21,WA] | 0.19  | 0.17  | 0.22  | 1.00 |
| b[1,WI]  | -0.06 | -0.09 | -0.03 | 1.00 |
| b[2,WI]  | 0.23  | 0.20  | 0.25  | 1.00 |
| b[3,WI]  | 0.15  | 0.13  | 0.18  | 1.00 |
| b[4,WI]  | 0.18  | 0.16  | 0.21  | 1.00 |
| b[5,WI]  | 0.11  | 0.08  | 0.14  | 1.00 |
| b[6,WI]  | 0.28  | 0.25  | 0.31  | 1.00 |
| b[7,WI]  | 0.17  | 0.14  | 0.20  | 1.00 |
| b[8,WI]  | 0.15  | 0.12  | 0.18  | 1.00 |
| b[9,WI]  | 0.16  | 0.14  | 0.19  | 1.00 |
| b[10,WI] | 0.16  | 0.13  | 0.19  | 1.00 |
| b[11,WI] | 0.18  | 0.15  | 0.21  | 1.00 |
| b[12,WI] | 0.19  | 0.16  | 0.21  | 1.00 |
| b[13,WI] | 0.19  | 0.16  | 0.21  | 1.00 |
| b[14,WI] | 0.19  | 0.16  | 0.21  | 1.00 |
| b[15,WI] | 0.19  | 0.17  | 0.22  | 1.00 |
| b[16,WI] | 0.19  | 0.17  | 0.22  | 1.00 |
| b[17,WI] | 0.20  | 0.18  | 0.23  | 1.00 |
| b[18,WI] | 0.18  | 0.15  | 0.21  | 1.00 |
| b[19,WI] | 0.24  | 0.21  | 0.27  | 1.00 |
| b[20,WI] | 0.22  | 0.20  | 0.25  | 1.00 |
| b[21,WI] | 0.23  | 0.20  | 0.26  | 1.00 |
| b[1,WV]  | 0.04  | 0.01  | 0.07  | 1.00 |
| b[2,WV]  | 0.06  | 0.04  | 0.09  | 1.00 |
| b[3,WV]  | 0.08  | 0.05  | 0.10  | 1.00 |
| b[4,WV]  | 0.05  | 0.02  | 0.08  | 1.00 |
| b[5,WV]  | 0.08  | 0.05  | 0.11  | 1.00 |
| b[6,WV]  | 0.10  | 0.07  | 0.12  | 1.00 |
| b[7,WV]  | 0.17  | 0.14  | 0.19  | 1.00 |
| b[8,WV]  | 0.21  | 0.18  | 0.23  | 1.00 |
| b[9,WV]  | 0.21  | 0.18  | 0.24  | 1.00 |
| b[10,WV] | 0.30  | 0.28  | 0.33  | 1.00 |
| b[11,WV] | 0.30  | 0.27  | 0.33  | 1.00 |
| b[12,WV] | 0.31  | 0.28  | 0.33  | 1.00 |
| b[13,WV] | 0.33  | 0.30  | 0.35  | 1.00 |
| b[14,WV] | 0.25  | 0.23  | 0.28  | 1.00 |
| b[15,WV] | 0.28  | 0.25  | 0.30  | 1.00 |
| b[16,WV] | 0.24  | 0.22  | 0.27  | 1.00 |
| b[17,WV] | 0.25  | 0.22  | 0.27  | 1.00 |
| b[18,WV] | 0.24  | 0.22  | 0.27  | 1.00 |
| b[19,WV] | 0.23  | 0.20  | 0.26  | 1.00 |
| b[20,WV] | 0.21  | 0.18  | 0.23  | 1.00 |

**Appendix**  
**Governor's Party, Policies, and COVID-19 Outcomes: Further Evidence of an Effect**  
**Shvetsova et al.**

|          |          |          |          |      |
|----------|----------|----------|----------|------|
| b[21,WV] | 0.24     | 0.21     | 0.27     | 1.00 |
| b[1,WY]  | -0.04    | -0.07    | -0.01    | 1.00 |
| b[2,WY]  | 0.01     | -0.02    | 0.04     | 1.00 |
| b[3,WY]  | -0.13    | -0.15    | -0.10    | 1.00 |
| b[4,WY]  | -0.06    | -0.09    | -0.04    | 1.00 |
| b[5,WY]  | -0.09    | -0.12    | -0.07    | 1.00 |
| b[6,WY]  | -0.16    | -0.19    | -0.14    | 1.00 |
| b[7,WY]  | -0.12    | -0.14    | -0.09    | 1.00 |
| b[8,WY]  | -0.25    | -0.28    | -0.22    | 1.00 |
| b[9,WY]  | -0.15    | -0.18    | -0.13    | 1.00 |
| b[10,WY] | -0.23    | -0.25    | -0.20    | 1.00 |
| b[11,WY] | -0.19    | -0.22    | -0.17    | 1.00 |
| b[12,WY] | -0.19    | -0.21    | -0.16    | 1.00 |
| b[13,WY] | -0.19    | -0.22    | -0.17    | 1.00 |
| b[14,WY] | -0.18    | -0.21    | -0.16    | 1.00 |
| b[15,WY] | -0.18    | -0.21    | -0.16    | 1.00 |
| b[16,WY] | -0.18    | -0.20    | -0.15    | 1.00 |
| b[17,WY] | -0.18    | -0.21    | -0.15    | 1.00 |
| b[18,WY] | -0.18    | -0.21    | -0.15    | 1.00 |
| b[19,WY] | -0.20    | -0.23    | -0.17    | 1.00 |
| b[20,WY] | -0.19    | -0.21    | -0.16    | 1.00 |
| b[21,WY] | -0.16    | -0.19    | -0.13    | 1.00 |
| tau      | 1,633.43 | 1,592.79 | 1,673.36 | 1.00 |
